# Supplementary material for: Mechanistic Insight into SARS-CoV-2 Mpro Inhibition by Organoselenides: The Ebselen Case Study
Source: MDPI journal article supplement (doi:10.3390/app11146291), 2021-07-07
Supplement: s1 [file s1]

## SUPPLEMENTARY INFORMATION

# Mechanistic Insight into SARS-CoV-2 M<sup>pro</sup> Inhibition by Organoselenides: The Ebselen Case Study

Andrea Madabeni <sup>1</sup>, Pablo Andrei Nogara <sup>2</sup>, Folorunsho Bright Oimage <sup>2</sup>, João Batista Teixeira Rocha <sup>2,\*</sup> and Laura Orian <sup>1,\*</sup>

<sup>1</sup> Dipartimento di Scienze Chimiche, Università Degli Studi di Padova, 35131 Padova, Italy; andrea.madabeni@phd.unipd.it

<sup>2</sup> Departamento de Bioquímica e Biologia Molecular, Universidade Federal de Santa Maria (UFSM), Santa Maria 97105-900, RS, Brazil; pbnogara@gmail.com (P.A.N.); oimagefolorunsho@gmail.com (F.B.O.)

\* Correspondence: jbtrocha@gmail.com (J.B.T.R.); laura.orian@unipd.it (L.O.)

## TABLE OF CONTENTS

|                                                                                                                                                                                          |    |
|------------------------------------------------------------------------------------------------------------------------------------------------------------------------------------------|----|
| Table S1. Coordinates (Å) energies (E, Hartree) and number of imaginary frequencies (Nimag) of stationary points as computed at B3LYP-D3(BJ)/6-311G(d,p),cc-pVTZ level of theory. ....   | 4  |
| Table S2. Electronic ( $\Delta E$ ) and Gibbs ( $\Delta G_{\text{solv}}$ ) free energies (kcal mol <sup>-1</sup> ) relative to the RC for Ebselen (EbSe) mechanism. ....                 | 22 |
| Table S3. Electronic ( $\Delta E$ ) and Gibbs ( $\Delta G_{\text{solv}}$ ) free energies (kcal mol <sup>-1</sup> ) relative to the RC for Ebselen ethanethiolate (EbSeS) mechanism. .... | 22 |

**Table S1.** Coordinates (Å) energies (E, Hartree) and number of imaginary frequencies (Nimag) of stationary points as computed at B3LYP-D3(BJ)/6-311G(d,p),cc-pVTZ level of theory.

## EbSe

### RC

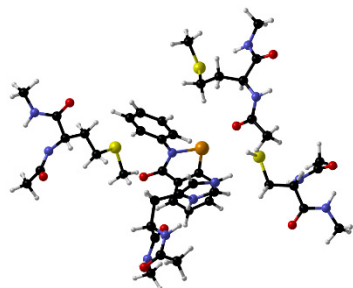

E= -6593.92352923

Nimag=0

|   |               |              |              |
|---|---------------|--------------|--------------|
| C | -0.558802000  | -5.922518000 | 5.061952000  |
| C | -1.505444000  | -5.636505000 | 3.915986000  |
| O | -2.462428000  | -6.370227000 | 3.672768000  |
| H | 0.242203000   | -5.187942000 | 5.157370000  |
| H | -0.125236000  | -6.913808000 | 4.917952000  |
| H | -1.135948000  | -5.948278000 | 5.988225000  |
| N | -1.235896000  | -4.527563000 | 3.187902000  |
| C | -2.099410000  | -4.052621000 | 2.112205000  |
| C | -1.879914000  | -4.801118000 | 0.803286000  |
| O | -1.349318000  | -4.292119000 | -0.184578000 |
| C | -1.875409000  | -2.529172000 | 1.963822000  |
| C | -0.427793000  | -2.153067000 | 1.941487000  |
| N | 0.413095000   | -2.478765000 | 0.898657000  |
| C | 0.386833000   | -1.526292000 | 2.860581000  |
| C | 1.661248000   | -2.041809000 | 1.216234000  |
| N | 1.686809000   | -1.455635000 | 2.396507000  |
| H | 0.098667000   | -3.033913000 | 0.107549000  |
| H | -3.132153000  | -4.233381000 | 2.421979000  |
| H | -2.381663000  | -2.176922000 | 1.063872000  |
| H | -2.337496000  | -2.034090000 | 2.820093000  |
| H | 2.498679000   | -2.174469000 | 0.552338000  |
| H | 0.099300000   | -1.093720000 | 3.806834000  |
| H | -0.416794000  | -3.967727000 | 3.386157000  |
| N | -2.332426000  | -6.070493000 | 0.831449000  |
| C | -2.158872000  | -6.990138000 | -0.277940000 |
| H | -2.673713000  | -6.414286000 | 1.727016000  |
| H | -1.600823000  | -6.477860000 | -1.059463000 |
| H | -3.125957000  | -7.306949000 | -0.678363000 |
| H | -1.604206000  | -7.876276000 | 0.041608000  |
| C | -9.774415000  | -1.601571000 | -1.478454000 |
| C | -8.883720000  | -0.781423000 | -0.563598000 |
| O | -8.602757000  | -1.137516000 | 0.563688000  |
| H | -10.142409000 | -1.044854000 | -2.342720000 |
| H | -10.618388000 | -1.977794000 | -0.900511000 |
| H | -9.205510000  | -2.464563000 | -1.833604000 |
| N | -8.417946000  | 0.395741000  | -1.104999000 |
| C | -7.357393000  | 1.171375000  | -0.468800000 |
| C | -7.826180000  | 2.492618000  | 0.129517000  |

|   |               |              |              |
|---|---------------|--------------|--------------|
| O | -7.010461000  | 3.284128000  | 0.583605000  |
| C | -6.236042000  | 1.455385000  | -1.483162000 |
| C | -5.538608000  | 0.197808000  | -1.988806000 |
| S | -4.446821000  | 0.636923000  | -3.388310000 |
| C | -3.942164000  | -1.038066000 | -3.885557000 |
| H | -6.982806000  | 0.566613000  | 0.360602000  |
| H | -6.669917000  | 2.002947000  | -2.329823000 |
| H | -5.523400000  | 2.132901000  | -1.015834000 |
| H | -4.933107000  | -0.267058000 | -1.207560000 |
| H | -6.267235000  | -0.535466000 | -2.344862000 |
| H | -3.145921000  | -0.933064000 | -4.622749000 |
| H | -4.778508000  | -1.579897000 | -4.332469000 |
| H | -3.560266000  | -1.566803000 | -3.014225000 |
| H | -8.572341000  | 0.556064000  | -2.089288000 |
| N | -9.162839000  | 2.708099000  | 0.121492000  |
| C | -9.767547000  | 3.882379000  | 0.722066000  |
| H | -9.744013000  | 1.963271000  | -0.228529000 |
| H | -8.961077000  | 4.550041000  | 1.020410000  |
| H | -10.354896000 | 3.617260000  | 1.606111000  |
| H | -10.414719000 | 4.395878000  | 0.006290000  |
| C | 8.356753000   | -0.240699000 | -3.731544000 |
| C | 8.134147000   | -0.698074000 | -2.306629000 |
| O | 8.958611000   | -0.490888000 | -1.423006000 |
| H | 7.617681000   | -0.629079000 | -4.434347000 |
| H | 9.355654000   | -0.543743000 | -4.046682000 |
| H | 8.319314000   | 0.850837000  | -3.749900000 |
| N | 6.958369000   | -1.335746000 | -2.062543000 |
| C | 6.538059000   | -1.712066000 | -0.720826000 |
| C | 7.112304000   | -3.071120000 | -0.347752000 |
| O | 6.410929000   | -4.071559000 | -0.283402000 |
| C | 5.022159000   | -1.647789000 | -0.592960000 |
| S | 4.434550000   | 0.055795000  | -0.985688000 |
| H | 3.721602000   | 0.301980000  | 0.135492000  |
| H | 6.974861000   | -0.962238000 | -0.055623000 |
| H | 4.545575000   | -2.373335000 | -1.253881000 |
| H | 4.736232000   | -1.896819000 | 0.426458000  |
| H | 6.343874000   | -1.548352000 | -2.832473000 |
| N | 8.444781000   | -3.044365000 | -0.103419000 |
| C | 9.205006000   | -4.249528000 | 0.172835000  |
| H | 8.929691000   | -2.169493000 | -0.277937000 |
| H | 8.498824000   | -5.066500000 | 0.310427000  |
| H | 9.799193000   | -4.129398000 | 1.082020000  |
| H | 9.876238000   | -4.495713000 | -0.656008000 |
| C | 4.737936000   | 1.279641000  | 2.794256000  |
| C | 3.871249000   | 2.261603000  | 2.041606000  |
| O | 2.985698000   | 1.878407000  | 1.273285000  |
| H | 5.233508000   | 1.723025000  | 3.659350000  |
| H | 5.501906000   | 0.899094000  | 2.109762000  |
| H | 4.111697000   | 0.441011000  | 3.102487000  |
| N | 4.117465000   | 3.577224000  | 2.229664000  |
| C | 3.381529000   | 4.570622000  | 1.454885000  |
| C | 4.173136000   | 5.869227000  | 1.370857000  |
| O | 5.125204000   | 6.080661000  | 2.112902000  |
| C | 1.933258000   | 4.787875000  | 1.984978000  |
| C | 0.857800000   | 4.403941000  | 0.967877000  |
| S | 0.788444000   | 5.433754000  | -0.541990000 |

|    |              |              |              |
|----|--------------|--------------|--------------|
| C  | 0.115568000  | 6.975676000  | 0.154825000  |
| H  | 3.291976000  | 4.171911000  | 0.439364000  |
| H  | 1.802212000  | 4.155945000  | 2.866468000  |
| H  | 1.797573000  | 5.819573000  | 2.319831000  |
| H  | 1.047660000  | 3.391203000  | 0.614022000  |
| H  | -0.135277000 | 4.412700000  | 1.419086000  |
| H  | -0.030385000 | 7.665776000  | -0.676498000 |
| H  | 0.803997000  | 7.424388000  | 0.873037000  |
| H  | -0.847110000 | 6.785270000  | 0.631429000  |
| H  | 4.896841000  | 3.921362000  | 2.774617000  |
| N  | 3.716088000  | 6.736610000  | 0.441388000  |
| H  | 2.948190000  | 6.429643000  | -0.151130000 |
| C  | 4.323960000  | 8.036211000  | 0.221446000  |
| H  | 5.083187000  | 8.183986000  | 0.987398000  |
| H  | 3.577375000  | 8.831451000  | 0.295264000  |
| H  | 4.798976000  | 8.089019000  | -0.762406000 |
| Se | 0.945204000  | 0.570681000  | -1.080621000 |
| C  | 0.761271000  | -0.957449000 | -2.178667000 |
| C  | -0.520082000 | -1.510807000 | -2.086950000 |
| C  | -0.819723000 | -2.695474000 | -2.761794000 |
| C  | 0.153753000  | -3.296877000 | -3.545148000 |
| C  | 1.427552000  | -2.722024000 | -3.648098000 |
| C  | 1.747359000  | -1.554205000 | -2.965129000 |
| N  | -0.865586000 | 0.295019000  | -0.631276000 |
| C  | -1.466045000 | -0.813705000 | -1.196578000 |
| O  | -2.615215000 | -1.171316000 | -0.953782000 |
| C  | -1.481371000 | 1.099416000  | 0.365645000  |
| C  | -2.764262000 | 1.607812000  | 0.147003000  |
| C  | -3.386334000 | 2.360898000  | 1.137918000  |
| C  | -2.719738000 | 2.626114000  | 2.334935000  |
| C  | -1.430695000 | 2.137201000  | 2.536209000  |
| C  | -0.806748000 | 1.368234000  | 1.557379000  |
| H  | -1.795590000 | -3.139555000 | -2.623094000 |
| H  | -0.064974000 | -4.219352000 | -4.068731000 |
| H  | 2.182501000  | -3.200532000 | -4.261837000 |
| H  | 2.735840000  | -1.119373000 | -3.026534000 |
| H  | -3.250214000 | 1.406778000  | -0.797281000 |
| H  | -4.389674000 | 2.742414000  | 0.979995000  |
| H  | -3.206726000 | 3.212519000  | 3.105399000  |
| H  | -0.906845000 | 2.342358000  | 3.463070000  |
| H  | 0.188048000  | 0.971738000  | 1.717916000  |

TS1

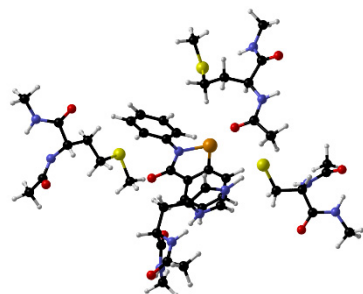

E= -6593.89978579

Nimag= -896.3

|   |              |              |             |
|---|--------------|--------------|-------------|
| C | -0.506199000 | -5.878656000 | 5.110180000 |
| C | -1.429578000 | -5.690171000 | 3.927245000 |
| O | -2.347497000 | -6.471743000 | 3.689804000 |

|   |               |              |              |
|---|---------------|--------------|--------------|
| H | -0.135147000  | -6.904148000 | 5.104029000  |
| H | -1.086902000  | -5.744189000 | 6.025530000  |
| H | 0.336659000   | -5.185905000 | 5.120350000  |
| N | -1.187141000  | -4.607827000 | 3.146754000  |
| C | -2.059777000  | -4.156551000 | 2.068355000  |
| C | -1.829805000  | -4.912708000 | 0.765588000  |
| O | -1.686453000  | -4.358346000 | -0.326841000 |
| C | -1.668294000  | -2.657092000 | 1.810536000  |
| C | -0.203183000  | -2.426095000 | 1.470066000  |
| N | 0.422330000   | -3.082469000 | 0.416573000  |
| C | 0.755052000   | -1.551405000 | 1.941416000  |
| C | 1.661733000   | -2.612941000 | 0.261173000  |
| N | 1.906015000   | -1.687258000 | 1.174478000  |
| H | -0.104451000  | -3.674081000 | -0.226253000 |
| H | -3.104960000  | -4.245214000 | 2.368272000  |
| H | -2.270769000  | -2.271327000 | 0.985191000  |
| H | -1.906549000  | -2.070291000 | 2.699169000  |
| H | 2.336125000   | -2.904030000 | -0.524732000 |
| H | 0.694006000   | -0.821609000 | 2.729419000  |
| H | -0.384803000  | -4.028162000 | 3.343271000  |
| N | -1.880043000  | -6.250093000 | 0.897538000  |
| C | -1.757508000  | -7.160598000 | -0.228158000 |
| H | -2.136836000  | -6.619084000 | 1.812391000  |
| H | -1.508542000  | -6.581274000 | -1.114439000 |
| H | -2.699453000  | -7.687762000 | -0.402346000 |
| H | -0.972285000  | -7.896419000 | -0.039458000 |
| C | -9.782316000  | -1.867095000 | -1.528461000 |
| C | -8.899967000  | -1.025821000 | -0.624884000 |
| O | -8.606864000  | -1.369467000 | 0.503332000  |
| H | -10.154961000 | -1.326445000 | -2.400812000 |
| H | -10.623426000 | -2.242316000 | -0.945573000 |
| H | -9.205754000  | -2.730243000 | -1.870475000 |
| N | -8.457997000  | 0.155711000  | -1.176879000 |
| C | -7.409807000  | 0.954636000  | -0.549070000 |
| C | -7.900231000  | 2.272834000  | 0.038723000  |
| O | -7.099142000  | 3.072129000  | 0.505353000  |
| C | -6.287398000  | 1.247804000  | -1.558663000 |
| C | -5.531656000  | 0.003036000  | -2.008457000 |
| S | -4.466714000  | 0.429584000  | -3.430871000 |
| C | -3.821274000  | -1.229668000 | -3.799278000 |
| H | -7.028337000  | 0.364878000  | 0.288054000  |
| H | -6.730946000  | 1.747828000  | -2.429497000 |
| H | -5.607606000  | 1.968345000  | -1.106555000 |
| H | -4.900801000  | -0.389730000 | -1.207733000 |
| H | -6.224738000  | -0.782473000 | -2.322527000 |
| H | -3.041608000  | -1.114670000 | -4.552646000 |
| H | -4.609201000  | -1.876357000 | -4.191497000 |
| H | -3.389409000  | -1.648810000 | -2.892014000 |
| H | -8.611786000  | 0.300758000  | -2.163773000 |
| N | -9.237968000  | 2.477380000  | 0.007805000  |
| C | -9.862180000  | 3.649395000  | 0.593009000  |
| H | -9.807171000  | 1.726486000  | -0.348970000 |
| H | -9.066405000  | 4.325448000  | 0.900915000  |
| H | -10.461374000 | 3.383381000  | 1.468778000  |
| H | -10.502034000 | 4.153652000  | -0.135702000 |
| C | 8.265867000   | -0.167638000 | -3.832541000 |
| C | 8.104272000   | -0.673991000 | -2.413722000 |
| O | 8.976308000   | -0.497518000 | -1.567486000 |
| H | 7.493863000   | -0.527625000 | -4.515129000 |
| H | 9.246855000   | -0.468037000 | -4.202175000 |
| H | 8.238890000   | 0.924270000  | -3.813215000 |

|    |              |              |              |
|----|--------------|--------------|--------------|
| N  | 6.944328000  | -1.322141000 | -2.143530000 |
| C  | 6.532016000  | -1.693965000 | -0.798055000 |
| C  | 7.130132000  | -3.039842000 | -0.414214000 |
| O  | 6.457396000  | -4.054327000 | -0.277436000 |
| C  | 4.993783000  | -1.742868000 | -0.668625000 |
| S  | 4.183400000  | -0.218008000 | -0.024596000 |
| H  | 2.880759000  | -0.984968000 | 0.888521000  |
| H  | 6.928306000  | -0.935199000 | -0.118772000 |
| H  | 4.567557000  | -2.019098000 | -1.641263000 |
| H  | 4.766344000  | -2.571565000 | -0.001578000 |
| H  | 6.255362000  | -1.408794000 | -2.873307000 |
| N  | 8.473921000  | -2.997909000 | -0.237783000 |
| C  | 9.258025000  | -4.184012000 | 0.045678000  |
| H  | 8.941268000  | -2.120707000 | -0.450360000 |
| H  | 8.568101000  | -5.003068000 | 0.241606000  |
| H  | 9.891008000  | -4.027936000 | 0.923308000  |
| H  | 9.896733000  | -4.453091000 | -0.802218000 |
| C  | 4.481837000  | 1.456645000  | 3.198846000  |
| C  | 3.558578000  | 2.340503000  | 2.393331000  |
| O  | 2.457763000  | 1.946231000  | 2.005272000  |
| H  | 5.322787000  | 1.997005000  | 3.636894000  |
| H  | 4.856153000  | 0.681187000  | 2.524388000  |
| H  | 3.905388000  | 0.972589000  | 3.988552000  |
| N  | 4.026029000  | 3.578359000  | 2.111040000  |
| C  | 3.272477000  | 4.552455000  | 1.328634000  |
| C  | 4.041555000  | 5.863636000  | 1.232501000  |
| O  | 4.979751000  | 6.103139000  | 1.983559000  |
| C  | 1.852801000  | 4.834275000  | 1.920698000  |
| C  | 0.711654000  | 4.516208000  | 0.958042000  |
| S  | 0.599437000  | 5.542640000  | -0.551528000 |
| C  | 0.069972000  | 7.123831000  | 0.179667000  |
| H  | 3.139154000  | 4.151695000  | 0.317651000  |
| H  | 1.717979000  | 4.204616000  | 2.799970000  |
| H  | 1.789037000  | 5.870251000  | 2.263680000  |
| H  | 0.827155000  | 3.496715000  | 0.596030000  |
| H  | -0.253701000 | 4.570835000  | 1.463495000  |
| H  | -0.088408000 | 7.821181000  | -0.643326000 |
| H  | 0.831731000  | 7.528347000  | 0.848258000  |
| H  | -0.868413000 | 6.994145000  | 0.720952000  |
| H  | 4.895854000  | 3.919209000  | 2.497521000  |
| N  | 3.587065000  | 6.710261000  | 0.282958000  |
| H  | 2.809606000  | 6.399507000  | -0.294661000 |
| C  | 4.161426000  | 8.026121000  | 0.072537000  |
| H  | 4.954546000  | 8.165137000  | 0.805031000  |
| H  | 3.408965000  | 8.809019000  | 0.205153000  |
| H  | 4.585375000  | 8.112455000  | -0.931668000 |
| Se | 1.046767000  | 0.935341000  | -0.769340000 |
| C  | 0.975241000  | -0.512640000 | -1.975752000 |
| C  | -0.275820000 | -1.136338000 | -1.988379000 |
| C  | -0.462178000 | -2.314720000 | -2.714732000 |
| C  | 0.594533000  | -2.834995000 | -3.448460000 |
| C  | 1.835802000  | -2.180274000 | -3.457294000 |
| C  | 2.041481000  | -1.020008000 | -2.720739000 |
| N  | -0.806697000 | 0.586592000  | -0.491106000 |
| C  | -1.301063000 | -0.543330000 | -1.111413000 |
| O  | -2.424095000 | -1.005728000 | -0.917730000 |
| C  | -1.533840000 | 1.300138000  | 0.497636000  |
| C  | -2.861134000 | 1.664236000  | 0.246889000  |
| C  | -3.590552000 | 2.339882000  | 1.219486000  |
| C  | -2.993265000 | 2.671782000  | 2.436487000  |
| C  | -1.664210000 | 2.329205000  | 2.672433000  |

|   |              |              |              |
|---|--------------|--------------|--------------|
| C | -0.929738000 | 1.638704000  | 1.710685000  |
| H | -1.418557000 | -2.817481000 | -2.658471000 |
| H | 0.463599000  | -3.748585000 | -4.015772000 |
| H | 2.653084000  | -2.592361000 | -4.038574000 |
| H | 3.006756000  | -0.533693000 | -2.682358000 |
| H | -3.299268000 | 1.415412000  | -0.709196000 |
| H | -4.622109000 | 2.616476000  | 1.027512000  |
| H | -3.562554000 | 3.202234000  | 3.190804000  |
| H | -1.188322000 | 2.597703000  | 3.609027000  |
| H | 0.110714000  | 1.396262000  | 1.891605000  |

TCI

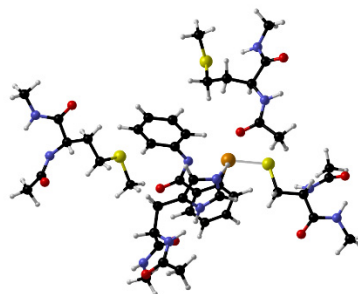

E= -6593.91808085

Nimag=0

|   |               |              |              |
|---|---------------|--------------|--------------|
| C | -0.853337000  | -5.890051000 | 5.132500000  |
| C | -1.782052000  | -5.525869000 | 3.994601000  |
| O | -2.758378000  | -6.205973000 | 3.705539000  |
| H | -0.068772000  | -5.152119000 | 5.308303000  |
| H | -0.393278000  | -6.855240000 | 4.911688000  |
| H | -1.446924000  | -6.008944000 | 6.040228000  |
| N | -1.473552000  | -4.389459000 | 3.308452000  |
| C | -2.321886000  | -3.942563000 | 2.208938000  |
| C | -2.099455000  | -4.738543000 | 0.928866000  |
| O | -1.173100000  | -4.496452000 | 0.150149000  |
| C | -2.120755000  | -2.424120000 | 1.984770000  |
| C | -0.699406000  | -1.966373000 | 2.022106000  |
| N | 0.285260000   | -2.546730000 | 1.231128000  |
| C | -0.097933000  | -0.920429000 | 2.657710000  |
| C | 1.420462000   | -1.868175000 | 1.349898000  |
| N | 1.220468000   | -0.879832000 | 2.231342000  |
| H | 0.037475000   | -3.336178000 | 0.605621000  |
| H | -3.355145000  | -4.096072000 | 2.524290000  |
| H | -2.529085000  | -2.132090000 | 1.010294000  |
| H | -2.666155000  | -1.880714000 | 2.757499000  |
| H | 2.336366000   | -2.081143000 | 0.834390000  |
| H | -0.509899000  | -0.170119000 | 3.306036000  |
| H | -0.647662000  | -3.857817000 | 3.532753000  |
| N | -2.978068000  | -5.737884000 | 0.738431000  |
| C | -2.858626000  | -6.669105000 | -0.372363000 |
| H | -3.511402000  | -6.016273000 | 1.552967000  |
| H | -2.298784000  | -6.181229000 | -1.167369000 |
| H | -3.851405000  | -6.939256000 | -0.734573000 |
| H | -2.326204000  | -7.577187000 | -0.073125000 |
| C | -9.909785000  | -1.544209000 | -1.568647000 |
| C | -9.009094000  | -0.717926000 | -0.669082000 |
| O | -8.708949000  | -1.073520000 | 0.454110000  |
| H | -10.286804000 | -0.993504000 | -2.432756000 |
| H | -10.747937000 | -1.915403000 | -0.978936000 |

|   |               |              |              |
|---|---------------|--------------|--------------|
| H | -9.345523000  | -2.410223000 | -1.923742000 |
| N | -8.560464000  | 0.461205000  | -1.218856000 |
| C | -7.496796000  | 1.246630000  | -0.600070000 |
| C | -7.955770000  | 2.593006000  | -0.052309000 |
| O | -7.136554000  | 3.384824000  | 0.390237000  |
| C | -6.338217000  | 1.446377000  | -1.590990000 |
| C | -5.643268000  | 0.139409000  | -1.962868000 |
| S | -4.519862000  | 0.426695000  | -3.373213000 |
| C | -3.879884000  | -1.262402000 | -3.592328000 |
| H | -7.157745000  | 0.667993000  | 0.263385000  |
| H | -6.733292000  | 1.926773000  | -2.495376000 |
| H | -5.629175000  | 2.148663000  | -1.154782000 |
| H | -5.069549000  | -0.248088000 | -1.116866000 |
| H | -6.372816000  | -0.621930000 | -2.253002000 |
| H | -3.159829000  | -1.219832000 | -4.410449000 |
| H | -4.686164000  | -1.948765000 | -3.861990000 |
| H | -3.367098000  | -1.585792000 | -2.685602000 |
| H | -8.718948000  | 0.608728000  | -2.204805000 |
| N | -9.291256000  | 2.823535000  | -0.085560000 |
| C | -9.888013000  | 4.022390000  | 0.472417000  |
| H | -9.877333000  | 2.074601000  | -0.417958000 |
| H | -9.076242000  | 4.688449000  | 0.760099000  |
| H | -10.489012000 | 3.792268000  | 1.357308000  |
| H | -10.520176000 | 4.522701000  | -0.265864000 |
| C | 8.123855000   | -0.268157000 | -3.620752000 |
| C | 7.978112000   | -0.842781000 | -2.228686000 |
| O | 8.864256000   | -0.728961000 | -1.385155000 |
| H | 7.440892000   | -0.720039000 | -4.341878000 |
| H | 9.152844000   | -0.401874000 | -3.952555000 |
| H | 7.918930000   | 0.804699000  | -3.574053000 |
| N | 6.802969000   | -1.473223000 | -1.973290000 |
| C | 6.366417000   | -1.798097000 | -0.623338000 |
| C | 6.921858000   | -3.149578000 | -0.198041000 |
| O | 6.189746000   | -4.111821000 | -0.000802000 |
| C | 4.840378000   | -1.672299000 | -0.522391000 |
| S | 4.331655000   | -0.021053000 | -1.200105000 |
| H | 1.841530000   | -0.065598000 | 2.320279000  |
| H | 6.815101000   | -1.042402000 | 0.033198000  |
| H | 4.355152000   | -2.479427000 | -1.073739000 |
| H | 4.560851000   | -1.763947000 | 0.527879000  |
| H | 6.070234000   | -1.380694000 | -2.661556000 |
| N | 8.266046000   | -3.163028000 | -0.043367000 |
| C | 8.993882000   | -4.378227000 | 0.268896000  |
| H | 8.770543000   | -2.318666000 | -0.303684000 |
| H | 8.266968000   | -5.158250000 | 0.488999000  |
| H | 9.638207000   | -4.229644000 | 1.139523000  |
| H | 9.613854000   | -4.697642000 | -0.574804000 |
| C | 4.747749000   | 1.512541000  | 3.022529000  |
| C | 3.665243000   | 2.327053000  | 2.345135000  |
| O | 2.594998000   | 1.798603000  | 2.019936000  |
| H | 5.547529000   | 2.118390000  | 3.449623000  |
| H | 5.176495000   | 0.847597000  | 2.267418000  |
| H | 4.301135000   | 0.898046000  | 3.805355000  |
| N | 3.980405000   | 3.617206000  | 2.119628000  |
| C | 3.262741000   | 4.591112000  | 1.303987000  |
| C | 4.069869000   | 5.877182000  | 1.182471000  |
| O | 5.055952000   | 6.047158000  | 1.895699000  |
| C | 1.818506000   | 4.869265000  | 1.822678000  |
| C | 0.718582000   | 4.747145000  | 0.762845000  |
| S | 0.650390000   | 5.980888000  | -0.584887000 |
| C | 0.221842000   | 7.472967000  | 0.365243000  |

|    |              |              |              |
|----|--------------|--------------|--------------|
| H  | 3.162361000  | 4.164867000  | 0.297567000  |
| H  | 1.592610000  | 4.118988000  | 2.581690000  |
| H  | 1.777806000  | 5.841324000  | 2.321354000  |
| H  | 0.801032000  | 3.788673000  | 0.249940000  |
| H  | -0.260009000 | 4.754441000  | 1.241691000  |
| H  | 0.069929000  | 8.278344000  | -0.353628000 |
| H  | 1.023657000  | 7.752392000  | 1.050704000  |
| H  | -0.704007000 | 7.312851000  | 0.919750000  |
| H  | 4.868936000  | 3.975527000  | 2.451948000  |
| N  | 3.629405000  | 6.763059000  | 0.273042000  |
| H  | 2.809755000  | 6.519963000  | -0.283935000 |
| C  | 4.286614000  | 8.039400000  | 0.053121000  |
| H  | 5.057132000  | 8.159706000  | 0.812121000  |
| H  | 3.567877000  | 8.859135000  | 0.132159000  |
| H  | 4.753343000  | 8.075136000  | -0.935189000 |
| Se | 1.960990000  | 0.201794000  | -0.940185000 |
| C  | 1.431860000  | -1.276581000 | -2.072028000 |
| C  | 0.100314000  | -1.713968000 | -1.985742000 |
| C  | -0.298278000 | -2.850626000 | -2.693861000 |
| C  | 0.594789000  | -3.528976000 | -3.511183000 |
| C  | 1.904573000  | -3.062871000 | -3.628297000 |
| C  | 2.323987000  | -1.947736000 | -2.909930000 |
| N  | -0.393396000 | 0.146332000  | -0.634749000 |
| C  | -0.899457000 | -0.980044000 | -1.153484000 |
| O  | -2.043426000 | -1.459026000 | -0.984394000 |
| C  | -1.164957000 | 0.988897000  | 0.170273000  |
| C  | -2.553292000 | 1.169677000  | -0.007422000 |
| C  | -3.282201000 | 1.972291000  | 0.862781000  |
| C  | -2.662179000 | 2.616849000  | 1.934504000  |
| C  | -1.285262000 | 2.482224000  | 2.089293000  |
| C  | -0.542779000 | 1.700605000  | 1.208180000  |
| H  | -1.322057000 | -3.177681000 | -2.568901000 |
| H  | 0.276756000  | -4.408824000 | -4.058231000 |
| H  | 2.608228000  | -3.571488000 | -4.278106000 |
| H  | 3.337725000  | -1.582492000 | -3.004401000 |
| H  | -3.038995000 | 0.678816000  | -0.835344000 |
| H  | -4.347465000 | 2.107179000  | 0.708807000  |
| H  | -3.242340000 | 3.226289000  | 2.617416000  |
| H  | -0.775735000 | 2.994664000  | 2.899844000  |
| H  | 0.528352000  | 1.635064000  | 1.327113000  |

## TS2

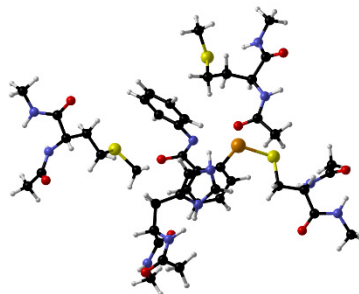

**E= -6593.87386064**

**Nimag= -1058.2**

|   |              |              |             |
|---|--------------|--------------|-------------|
| C | -0.909729000 | -6.153505000 | 5.004542000 |
| C | -1.824483000 | -5.824855000 | 3.846014000 |
| O | -2.798996000 | -6.517472000 | 3.571939000 |
| H | -0.094447000 | -5.439935000 | 5.132963000 |

|   |               |              |              |    |              |              |              |
|---|---------------|--------------|--------------|----|--------------|--------------|--------------|
| H | -0.494589000  | -7.150971000 | 4.849613000  | C  | 6.341133000  | -2.008924000 | -0.709466000 |
| H | -1.507118000  | -6.184888000 | 5.917415000  | C  | 6.898910000  | -3.368113000 | -0.312750000 |
| N | -1.506846000  | -4.711959000 | 3.130077000  | O  | 6.180811000  | -4.353026000 | -0.202054000 |
| C | -2.352067000  | -4.242621000 | 2.037538000  | C  | 4.833250000  | -1.769235000 | -0.616382000 |
| C | -2.122068000  | -5.008601000 | 0.740611000  | S  | 4.574544000  | -0.074915000 | -1.363727000 |
| O | -1.406450000  | -4.590588000 | -0.175372000 | H  | 0.772663000  | 0.142685000  | 1.011469000  |
| C | -2.259958000  | -2.739339000 | 1.878105000  | H  | 6.822254000  | -1.272502000 | -0.055613000 |
| C | -0.872913000  | -2.230390000 | 1.831959000  | H  | 4.266228000  | -2.516949000 | -1.173126000 |
| N | 0.137145000   | -2.808223000 | 1.071677000  | H  | 4.507051000  | -1.773618000 | 0.422539000  |
| C | -0.389427000  | -1.042693000 | 2.260912000  | H  | 6.143160000  | -1.802327000 | -2.814129000 |
| C | 1.146839000   | -1.934523000 | 0.984909000  | N  | 8.235416000  | -3.354465000 | -0.098585000 |
| N | 0.852242000   | -0.831628000 | 1.677641000  | C  | 8.981884000  | -4.566850000 | 0.183418000  |
| H | -0.056331000  | -3.611498000 | 0.462565000  | H  | 8.730841000  | -2.491126000 | -0.304450000 |
| H | -3.375449000  | -4.479087000 | 2.342438000  | H  | 8.266531000  | -5.369588000 | 0.353535000  |
| H | -2.767929000  | -2.434357000 | 0.957598000  | H  | 9.599537000  | -4.438400000 | 1.075667000  |
| H | -2.777215000  | -2.256086000 | 2.708297000  | H  | 9.629336000  | -4.839283000 | -0.655968000 |
| H | 2.021197000   | -2.071091000 | 0.376703000  | C  | 4.452727000  | 1.181308000  | 3.131827000  |
| H | -0.890064000  | -0.265091000 | 2.807693000  | C  | 3.495911000  | 2.082494000  | 2.376607000  |
| H | -0.681345000  | -4.178819000 | 3.357537000  | O  | 2.414760000  | 1.673706000  | 1.969085000  |
| N | -2.764075000  | -6.188257000 | 0.695183000  | H  | 5.232435000  | 1.726616000  | 3.666111000  |
| C | -2.608986000  | -7.125042000 | -0.405576000 | H  | 4.927463000  | 0.512811000  | 2.408166000  |
| H | -3.183682000  | -6.505889000 | 1.564891000  | H  | 3.882035000  | 0.570054000  | 3.830680000  |
| H | -2.087856000  | -6.617000000 | -1.214082000 | N  | 3.927776000  | 3.335555000  | 2.146176000  |
| H | -3.587260000  | -7.459748000 | -0.756036000 | C  | 3.210491000  | 4.325681000  | 1.349962000  |
| H | -2.026094000  | -7.997015000 | -0.095642000 | C  | 4.014234000  | 5.616530000  | 1.261060000  |
| C | -9.881074000  | -1.801023000 | -1.774245000 | O  | 4.971111000  | 5.804782000  | 2.009399000  |
| C | -8.979830000  | -1.012175000 | -0.841851000 | C  | 1.762457000  | 4.627973000  | 1.837760000  |
| O | -8.633991000  | -1.439579000 | 0.242820000  | C  | 0.700390000  | 4.498547000  | 0.742224000  |
| H | -10.299624000 | -1.202412000 | -2.585698000 | S  | 0.681660000  | 5.711551000  | -0.627497000 |
| H | -10.690086000 | -2.239613000 | -1.190038000 | C  | 0.182123000  | 7.205119000  | 0.284305000  |
| H | -9.302100000  | -2.621023000 | -2.206372000 | H  | 3.119231000  | 3.920641000  | 0.334048000  |
| N | -8.589943000  | 0.219846000  | -1.314787000 | H  | 1.498770000  | 3.896805000  | 2.600298000  |
| C | -7.531153000  | 0.994076000  | -0.673923000 | H  | 1.720977000  | 5.611522000  | 2.313614000  |
| C | -7.996384000  | 2.326289000  | -0.097559000 | H  | 0.807257000  | 3.533909000  | 0.248441000  |
| O | -7.187310000  | 3.150152000  | 0.300922000  | H  | -0.293948000 | 4.526316000  | 1.183082000  |
| C | -6.391960000  | 1.275004000  | -1.669138000 | H  | 0.031121000  | 7.998483000  | -0.448101000 |
| C | -5.582999000  | 0.045332000  | -2.075481000 | H  | 0.953352000  | 7.513068000  | 0.992419000  |
| S | -4.832765000  | 0.372076000  | -3.712266000 | H  | -0.755591000 | 7.022511000  | 0.811406000  |
| C | -3.520529000  | -0.884845000 | -3.712852000 | H  | 4.791456000  | 3.681514000  | 2.546004000  |
| H | -7.173682000  | 0.392213000  | 0.165103000  | N  | 3.607435000  | 6.508838000  | 0.342234000  |
| H | -6.839750000  | 1.739860000  | -2.558040000 | H  | 2.814501000  | 6.272830000  | -0.254371000 |
| H | -5.735579000  | 2.024857000  | -1.231739000 | C  | 4.272724000  | 7.789816000  | 0.187478000  |
| H | -4.779957000  | -0.141947000 | -1.359594000 | H  | 3.605121000  | 8.470856000  | -0.341409000 |
| H | -6.211934000  | -0.846894000 | -2.140810000 | H  | 5.204616000  | 7.696409000  | -0.378934000 |
| H | -2.936297000  | -0.740765000 | -4.622292000 | H  | 4.514949000  | 8.203066000  | 1.167260000  |
| H | -3.938081000  | -1.894506000 | -3.714783000 | Se | 2.500353000  | 0.576331000  | -0.851222000 |
| H | -2.884625000  | -0.734339000 | -2.842123000 | C  | 1.473582000  | -0.692687000 | -1.911076000 |
| H | -8.774072000  | 0.426729000  | -2.285693000 | C  | 0.112729000  | -0.905562000 | -1.623614000 |
| N | -9.340638000  | 2.509753000  | -0.055722000 | C  | -0.521950000 | -2.005441000 | -2.219022000 |
| C | -9.947771000  | 3.688114000  | 0.533059000  | C  | 0.133910000  | -2.845284000 | -3.103950000 |
| H | -9.918229000  | 1.743359000  | -0.361997000 | C  | 1.457572000  | -2.573112000 | -3.442869000 |
| H | -9.146241000  | 4.386831000  | 0.766999000  | C  | 2.119466000  | -1.509228000 | -2.843490000 |
| H | -10.483446000 | 3.441861000  | 1.454964000  | N  | -0.137283000 | 0.865329000  | 0.059322000  |
| H | -10.643717000 | 4.158757000  | -0.166448000 | C  | -0.764774000 | -0.037844000 | -0.746166000 |
| C | 8.173715000   | -0.554343000 | -3.717015000 | O  | -1.988349000 | -0.232597000 | -0.804564000 |
| C | 7.968465000   | -1.037173000 | -2.298888000 | C  | -0.970068000 | 1.739562000  | 0.800510000  |
| O | 8.808558000   | -0.858187000 | -1.422568000 | C  | -2.117312000 | 2.342060000  | 0.253348000  |
| H | 7.470170000   | -0.990529000 | -4.428052000 | C  | -2.908072000 | 3.191960000  | 1.017219000  |
| H | 9.194860000   | -0.780012000 | -4.023627000 | C  | -2.583518000 | 3.468917000  | 2.346259000  |
| H | 8.051440000   | 0.531539000  | -3.728821000 | C  | -1.437579000 | 2.896921000  | 2.891280000  |
| N | 6.782162000   | -1.652131000 | -2.049870000 | C  | -0.635880000 | 2.051928000  | 2.128204000  |



|   |              |              |              |
|---|--------------|--------------|--------------|
| H | -1.549781000 | -2.189170000 | -1.945293000 |
| H | -0.383195000 | -3.697531000 | -3.527394000 |
| H | 1.982217000  | -3.194263000 | -4.160422000 |
| H | 3.154535000  | -1.309079000 | -3.087713000 |
| H | -2.393395000 | 2.130165000  | -0.768591000 |
| H | -3.798566000 | 3.627180000  | 0.577313000  |
| H | -3.213870000 | 4.119997000  | 2.940406000  |
| H | -1.151469000 | 3.117779000  | 3.914369000  |
| H | 0.287209000  | 1.670009000  | 2.540148000  |

# Pinhb

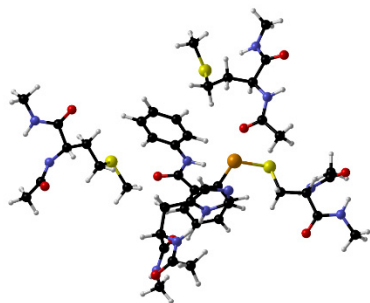

E= -6593.93759566

Nimag=0

|   |               |              |              |
|---|---------------|--------------|--------------|
| C | -0.698531000  | -5.858714000 | 5.057039000  |
| C | -1.624062000  | -5.599594000 | 3.888206000  |
| O | -2.566290000  | -6.347889000 | 3.632603000  |
| H | 0.108152000   | -5.129097000 | 5.141820000  |
| H | -0.273508000  | -6.858274000 | 4.951285000  |
| H | -1.289886000  | -5.849016000 | 5.974794000  |
| N | -1.352602000  | -4.495797000 | 3.151737000  |
| C | -2.214437000  | -4.040738000 | 2.066104000  |
| C | -1.979621000  | -4.800628000 | 0.766412000  |
| O | -1.445501000  | -4.288231000 | -0.219079000 |
| C | -1.944119000  | -2.523464000 | 1.878784000  |
| C | -0.482109000  | -2.213078000 | 1.946896000  |
| N | 0.432506000   | -2.693581000 | 1.031252000  |
| C | 0.282599000   | -1.572234000 | 2.897658000  |
| C | 1.674796000   | -2.322240000 | 1.448611000  |
| N | 1.623875000   | -1.637012000 | 2.573577000  |
| H | 0.155591000   | -3.248905000 | 0.226781000  |
| H | -3.251573000  | -4.201254000 | 2.370699000  |
| H | -2.377467000  | -2.192904000 | 0.933844000  |
| H | -2.441637000  | -1.976233000 | 2.680997000  |
| H | 2.565768000   | -2.580399000 | 0.901124000  |
| H | -0.064756000  | -1.045567000 | 3.772693000  |
| H | -0.559226000  | -3.910525000 | 3.377126000  |
| N | -2.420789000  | -6.071812000 | 0.798186000  |
| C | -2.234689000  | -6.996463000 | -0.305708000 |
| H | -2.760051000  | -6.413897000 | 1.695811000  |
| H | -1.770818000  | -6.454649000 | -1.127561000 |
| H | -3.195066000  | -7.400085000 | -0.636138000 |
| H | -1.587189000  | -7.826988000 | -0.010945000 |
| C | -9.914317000  | -1.692893000 | -1.575470000 |
| C | -9.031395000  | -0.852971000 | -0.670893000 |
| O | -8.765201000  | -1.182952000 | 0.468222000  |
| H | -10.245480000 | -1.167244000 | -2.473268000 |
| H | -10.782783000 | -2.024875000 | -1.006376000 |

|   |               |              |              |
|---|---------------|--------------|--------------|
| H | -9.356212000  | -2.583181000 | -1.875637000 |
| N | -8.557790000  | 0.310094000  | -1.234478000 |
| C | -7.508821000  | 1.102901000  | -0.600158000 |
| C | -7.994399000  | 2.425550000  | -0.018560000 |
| O | -7.193229000  | 3.212085000  | 0.467026000  |
| C | -6.383909000  | 1.392079000  | -1.609651000 |
| C | -5.649445000  | 0.143778000  | -2.100497000 |
| S | -4.943109000  | 0.501406000  | -3.748617000 |
| C | -4.000086000  | -1.028429000 | -4.024472000 |
| H | -7.134683000  | 0.512569000  | 0.239710000  |
| H | -6.833777000  | 1.916567000  | -2.463237000 |
| H | -5.687496000  | 2.094383000  | -1.154263000 |
| H | -4.842029000  | -0.135793000 | -1.421264000 |
| H | -6.332582000  | -0.704915000 | -2.192972000 |
| H | -3.514887000  | -0.931135000 | -4.996411000 |
| H | -4.662347000  | -1.897106000 | -4.043109000 |
| H | -3.245843000  | -1.132857000 | -3.247020000 |
| H | -8.687001000  | 0.438045000  | -2.227448000 |
| N | -9.329002000  | 2.649106000  | -0.082593000 |
| C | -9.949592000  | 3.829426000  | 0.488738000  |
| H | -9.900240000  | 1.906216000  | -0.452258000 |
| H | -9.151108000  | 4.492105000  | 0.818210000  |
| H | -10.575043000 | 3.571896000  | 1.348662000  |
| H | -10.562713000 | 4.345478000  | -0.254730000 |
| C | 8.270458000   | -0.231827000 | -3.757799000 |
| C | 8.023250000   | -0.647755000 | -2.325139000 |
| O | 8.829887000   | -0.414586000 | -1.431704000 |
| H | 7.503812000   | -0.580724000 | -4.451251000 |
| H | 9.245530000   | -0.607530000 | -4.070799000 |
| H | 8.308981000   | 0.858889000  | -3.794268000 |
| N | 6.840500000   | -1.276559000 | -2.083759000 |
| C | 6.415945000   | -1.643176000 | -0.740702000 |
| C | 7.001565000   | -2.992359000 | -0.350009000 |
| O | 6.316560000   | -4.005175000 | -0.315851000 |
| C | 4.891007000   | -1.574895000 | -0.635927000 |
| S | 4.354231000   | -0.037174000 | -1.524574000 |
| H | 6.846512000   | -0.880502000 | -0.085731000 |
| H | 4.430084000   | -2.451792000 | -1.090046000 |
| H | 4.587203000   | -1.513562000 | 0.407248000  |
| H | 6.247601000   | -1.525394000 | -2.859631000 |
| N | 8.323680000   | -2.940448000 | -0.063461000 |
| C | 9.099581000   | -4.133960000 | 0.222992000  |
| H | 8.798925000   | -2.059423000 | -0.233695000 |
| H | 8.405136000   | -4.960459000 | 0.362413000  |
| H | 9.687269000   | -3.997757000 | 1.133726000  |
| H | 9.777882000   | -4.375496000 | -0.601392000 |
| C | 4.546937000   | 1.412485000  | 2.815414000  |
| C | 3.622485000   | 2.372621000  | 2.101597000  |
| O | 2.634479000   | 1.978046000  | 1.483434000  |
| H | 5.088682000   | 1.878867000  | 3.640403000  |
| H | 5.276373000   | 1.035264000  | 2.092087000  |
| H | 3.958132000   | 0.567733000  | 3.173309000  |
| N | 3.938430000   | 3.687857000  | 2.148052000  |
| C | 3.183870000   | 4.629794000  | 1.350511000  |
| C | 3.963006000   | 5.935367000  | 1.257648000  |
| O | 4.947824000   | 6.109147000  | 1.971685000  |
| C | 1.728518000   | 4.835435000  | 1.870972000  |
| C | 0.657651000   | 4.482732000  | 0.838490000  |
| S | 0.573740000   | 5.569558000  | -0.631328000 |
| C | -0.118316000  | 7.074620000  | 0.125005000  |
| H | 3.102338000   | 4.217828000  | 0.337572000  |



|    |              |              |              |
|----|--------------|--------------|--------------|
| H  | 1.585088000  | 4.177043000  | 2.729462000  |
| H  | 1.594464000  | 5.857527000  | 2.235242000  |
| H  | 0.852085000  | 3.483262000  | 0.449798000  |
| H  | -0.334084000 | 4.468186000  | 1.292160000  |
| H  | -0.276115000 | 7.794670000  | -0.678301000 |
| H  | 0.565567000  | 7.504239000  | 0.859155000  |
| H  | -1.076662000 | 6.852168000  | 0.596460000  |
| H  | 4.776277000  | 4.049877000  | 2.585166000  |
| N  | 3.483055000  | 6.830955000  | 0.371880000  |
| H  | 2.694882000  | 6.543757000  | -0.205578000 |
| C  | 4.105235000  | 8.124601000  | 0.156542000  |
| H  | 4.895306000  | 8.243163000  | 0.895906000  |
| H  | 3.375724000  | 8.930062000  | 0.275452000  |
| H  | 4.543156000  | 8.190778000  | -0.843640000 |
| Se | 2.246480000  | 0.282773000  | -0.977200000 |
| C  | 1.320553000  | -1.114693000 | -1.978201000 |
| C  | -0.063859000 | -1.342203000 | -1.811685000 |
| C  | -0.646878000 | -2.424057000 | -2.487103000 |
| C  | 0.092678000  | -3.265443000 | -3.301502000 |
| C  | 1.448978000  | -3.014113000 | -3.483428000 |
| C  | 2.050868000  | -1.947848000 | -2.827265000 |
| N  | -0.560870000 | 0.234091000  | 0.017903000  |
| C  | -1.047118000 | -0.518669000 | -1.017264000 |
| O  | -2.238725000 | -0.550424000 | -1.303219000 |
| C  | -1.285981000 | 1.096899000  | 0.870341000  |
| C  | -2.580282000 | 1.553467000  | 0.591730000  |
| C  | -3.216110000 | 2.407341000  | 1.490531000  |
| C  | -2.578827000 | 2.813764000  | 2.660529000  |
| C  | -1.282833000 | 2.370017000  | 2.922838000  |
| C  | -0.633938000 | 1.521643000  | 2.035360000  |
| H  | -1.698735000 | -2.603299000 | -2.325750000 |
| H  | -0.385873000 | -4.106371000 | -3.787528000 |
| H  | 2.044931000  | -3.647700000 | -4.130652000 |
| H  | 3.102467000  | -1.745950000 | -2.981853000 |
| H  | -3.074799000 | 1.239021000  | -0.312150000 |
| H  | -4.223148000 | 2.746668000  | 1.272044000  |
| H  | -3.085746000 | 3.469809000  | 3.358194000  |
| H  | -0.767626000 | 2.689244000  | 3.821960000  |
| H  | 0.386071000  | 1.207551000  | 2.220525000  |
| H  | 0.356862000  | -0.007804000 | 0.372047000  |

# Pinhb+H<sub>2</sub>O

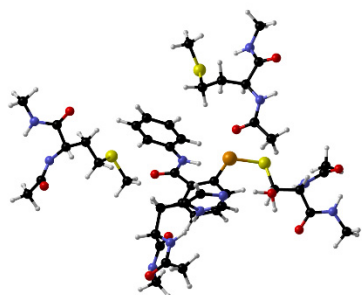

E=-6670.41343954

Nimag=0

|   |              |              |             |
|---|--------------|--------------|-------------|
| C | -0.651857000 | -5.857299000 | 4.981489000 |
| C | -1.592399000 | -5.604083000 | 3.823404000 |
| O | -2.529972000 | -6.360037000 | 3.575126000 |
| H | 0.164648000  | -5.136185000 | 5.043028000 |
| H | -0.241529000 | -6.863741000 | 4.885610000 |

|   |               |              |              |
|---|---------------|--------------|--------------|
| H | -1.228423000  | -5.824826000 | 5.908250000  |
| N | -1.343054000  | -4.492738000 | 3.090541000  |
| C | -2.221597000  | -4.043088000 | 2.016119000  |
| C | -1.989810000  | -4.792633000 | 0.709886000  |
| O | -1.499737000  | -4.268211000 | -0.292655000 |
| C | -1.931570000  | -2.524753000 | 1.828962000  |
| C | -0.457091000  | -2.252449000 | 1.823783000  |
| N | 0.380614000   | -2.723955000 | 0.833404000  |
| C | 0.389197000   | -1.686380000 | 2.753905000  |
| C | 1.656010000   | -2.432673000 | 1.179632000  |
| N | 1.702552000   | -1.801176000 | 2.338566000  |
| H | 0.027629000   | -3.245676000 | 0.034275000  |
| H | -3.256187000  | -4.198871000 | 2.328801000  |
| H | -2.400342000  | -2.173171000 | 0.909219000  |
| H | -2.376785000  | -1.976165000 | 2.660159000  |
| H | 2.503443000   | -2.689152000 | 0.566667000  |
| H | 0.125246000   | -1.181494000 | 3.669320000  |
| H | -0.540628000  | -3.913029000 | 3.295868000  |
| N | -2.413579000  | -6.069752000 | 0.738781000  |
| C | -2.226225000  | -6.985667000 | -0.372147000 |
| H | -2.729936000  | -6.424566000 | 1.640000000  |
| H | -1.833170000  | -6.421802000 | -1.215558000 |
| H | -3.177576000  | -7.442549000 | -0.654632000 |
| H | -1.519991000  | -7.778307000 | -0.108876000 |
| C | -9.988152000  | -1.778371000 | -1.535467000 |
| C | -9.107538000  | -0.931728000 | -0.634900000 |
| O | -8.824773000  | -1.264822000 | 0.499342000  |
| H | -10.337707000 | -1.251208000 | -2.425371000 |
| H | -10.844784000 | -2.127791000 | -0.958954000 |
| H | -9.420078000  | -2.657745000 | -1.848871000 |
| N | -8.655090000  | 0.240673000  | -1.196591000 |
| C | -7.610516000  | 1.043872000  | -0.568101000 |
| C | -8.107830000  | 2.356701000  | 0.025715000  |
| O | -7.312243000  | 3.149806000  | 0.509771000  |
| C | -6.499811000  | 1.355462000  | -1.586732000 |
| C | -5.756597000  | 0.121321000  | -2.098399000 |
| S | -5.043468000  | 0.515866000  | -3.735000000 |
| C | -4.101786000  | -1.008856000 | -4.040664000 |
| H | -7.220255000  | 0.453657000  | 0.264446000  |
| H | -6.964308000  | 1.883005000  | -2.430508000 |
| H | -5.806587000  | 2.061239000  | -1.131632000 |
| H | -4.951508000  | -0.168302000 | -1.420443000 |
| H | -6.434901000  | -0.728795000 | -2.211516000 |
| H | -3.607338000  | -0.888700000 | -5.005334000 |
| H | -4.765569000  | -1.875359000 | -4.086522000 |
| H | -3.354541000  | -1.133758000 | -3.259556000 |
| H | -8.797788000  | 0.373697000  | -2.187018000 |
| N | -9.445871000  | 2.562710000  | -0.023772000 |
| C | -10.076398000 | 3.731414000  | 0.560415000  |
| H | -10.010772000 | 1.815193000  | -0.393810000 |
| H | -9.283602000  | 4.401609000  | 0.888404000  |
| H | -10.691990000 | 3.460178000  | 1.423215000  |
| H | -10.701495000 | 4.245066000  | -0.174682000 |
| C | 8.152825000   | -0.061988000 | -3.889699000 |
| C | 7.925468000   | -0.489073000 | -2.457046000 |
| O | 8.742998000   | -0.256747000 | -1.573214000 |
| H | 7.368464000   | -0.391671000 | -4.572768000 |
| H | 9.115710000   | -0.450751000 | -4.224425000 |
| H | 8.209538000   | 1.028101000  | -3.916551000 |
| N | 6.753733000   | -1.135024000 | -2.207507000 |
| C | 6.347457000   | -1.514799000 | -0.862421000 |

|    |              |              |              |
|----|--------------|--------------|--------------|
| C  | 6.954959000  | -2.858122000 | -0.485280000 |
| O  | 6.282485000  | -3.880310000 | -0.435326000 |
| C  | 4.823781000  | -1.479856000 | -0.752326000 |
| S  | 4.270003000  | 0.092066000  | -1.565670000 |
| H  | 6.763403000  | -0.752423000 | -0.198520000 |
| H  | 4.379557000  | -2.335174000 | -1.262296000 |
| H  | 4.537745000  | -1.479752000 | 0.298535000  |
| H  | 6.145760000  | -1.368531000 | -2.976183000 |
| N  | 8.279044000  | -2.790139000 | -0.211554000 |
| C  | 9.073599000  | -3.974726000 | 0.060405000  |
| H  | 8.739873000  | -1.901487000 | -0.382687000 |
| H  | 8.391919000  | -4.814110000 | 0.185441000  |
| H  | 9.656440000  | -3.843021000 | 0.975135000  |
| H  | 9.758494000  | -4.192793000 | -0.765081000 |
| C  | 4.473600000  | 1.495817000  | 2.729386000  |
| C  | 3.529315000  | 2.447373000  | 2.030249000  |
| O  | 2.498142000  | 2.049018000  | 1.483677000  |
| H  | 5.353414000  | 1.991564000  | 3.143281000  |
| H  | 4.786096000  | 0.719070000  | 2.032318000  |
| H  | 3.936071000  | 0.988405000  | 3.531987000  |
| N  | 3.856987000  | 3.757487000  | 2.034153000  |
| C  | 3.053189000  | 4.702706000  | 1.296397000  |
| C  | 3.813892000  | 6.019052000  | 1.203267000  |
| O  | 4.803392000  | 6.202023000  | 1.908474000  |
| C  | 1.625519000  | 4.889826000  | 1.895871000  |
| C  | 0.506536000  | 4.541225000  | 0.915053000  |
| S  | 0.352311000  | 5.638924000  | -0.541002000 |
| C  | -0.284704000 | 7.144933000  | 0.260338000  |
| H  | 2.923940000  | 4.313561000  | 0.279686000  |
| H  | 1.531769000  | 4.220942000  | 2.752997000  |
| H  | 1.503139000  | 5.906937000  | 2.277881000  |
| H  | 0.685170000  | 3.545229000  | 0.510238000  |
| H  | -0.462689000 | 4.520739000  | 1.415496000  |
| H  | -0.478941000 | 7.871214000  | -0.529292000 |
| H  | 0.441800000  | 7.563955000  | 0.958747000  |
| H  | -1.218446000 | 6.928661000  | 0.781528000  |
| H  | 4.708100000  | 4.121585000  | 2.441739000  |
| N  | 3.313221000  | 6.913047000  | 0.327409000  |
| H  | 2.513976000  | 6.623509000  | -0.232348000 |
| C  | 3.915925000  | 8.216080000  | 0.113278000  |
| H  | 4.725902000  | 8.331242000  | 0.831325000  |
| H  | 3.183410000  | 9.013423000  | 0.265190000  |
| H  | 4.323535000  | 8.300185000  | -0.898183000 |
| Se | 2.160242000  | 0.369870000  | -1.009298000 |
| C  | 1.244133000  | -0.997840000 | -2.061360000 |
| C  | -0.134697000 | -1.262152000 | -1.895448000 |
| C  | -0.697353000 | -2.333905000 | -2.604820000 |
| C  | 0.054055000  | -3.127414000 | -3.455579000 |
| C  | 1.402515000  | -2.836625000 | -3.639462000 |
| C  | 1.984676000  | -1.782269000 | -2.947878000 |
| N  | -0.657453000 | 0.250866000  | -0.018939000 |
| C  | -1.133452000 | -0.499851000 | -1.059060000 |
| O  | -2.330592000 | -0.582162000 | -1.312718000 |
| C  | -1.397337000 | 1.058647000  | 0.872849000  |
| C  | -2.715435000 | 1.468061000  | 0.635253000  |
| C  | -3.362371000 | 2.276307000  | 1.567355000  |
| C  | -2.713568000 | 2.681569000  | 2.731548000  |
| C  | -1.395353000 | 2.284158000  | 2.953926000  |
| C  | -0.734613000 | 1.481874000  | 2.032589000  |
| H  | -1.743654000 | -2.542949000 | -2.441450000 |
| H  | -0.409170000 | -3.960423000 | -3.969508000 |

|   |              |              |              |
|---|--------------|--------------|--------------|
| H | 2.007259000  | -3.430744000 | -4.315351000 |
| H | 3.030655000  | -1.550803000 | -3.099715000 |
| H | -3.217046000 | 1.156215000  | -0.265637000 |
| H | -4.384540000 | 2.585927000  | 1.376557000  |
| H | -3.228006000 | 3.303899000  | 3.454115000  |
| H | -0.870921000 | 2.606403000  | 3.846619000  |
| H | 0.304106000  | 1.212220000  | 2.183475000  |
| H | 0.287429000  | 0.062629000  | 0.294354000  |
| O | 4.519708000  | -1.664534000 | 2.465223000  |
| H | 4.689052000  | -2.611171000 | 2.494723000  |
| H | 3.554191000  | -1.582520000 | 2.618791000  |

# **TS(Meisenheimer)**

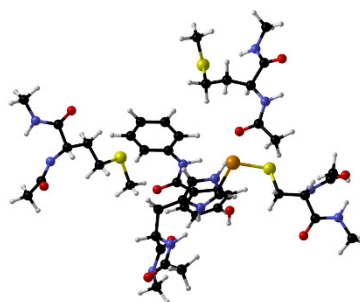

**E=-6670.31432321**

**Nimag=-394.0**

|   |               |              |              |
|---|---------------|--------------|--------------|
| C | -0.758927000  | -5.676098000 | 5.369744000  |
| C | -1.671255000  | -5.453919000 | 4.183155000  |
| O | -2.627252000  | -6.189644000 | 3.958349000  |
| H | 0.085290000   | -4.985519000 | 5.407952000  |
| H | -0.386069000  | -6.700855000 | 5.339023000  |
| H | -1.349688000  | -5.568390000 | 6.281750000  |
| N | -1.388185000  | -4.376928000 | 3.412202000  |
| C | -2.236599000  | -3.957167000 | 2.302249000  |
| C | -1.990101000  | -4.761225000 | 1.032211000  |
| O | -1.377291000  | -4.289797000 | 0.077666000  |
| C | -2.097502000  | -2.442030000 | 2.056316000  |
| C | -0.703417000  | -1.910305000 | 2.084862000  |
| N | 0.309592000   | -2.359081000 | 1.248190000  |
| C | -0.174134000  | -0.859490000 | 2.777446000  |
| C | 1.391608000   | -1.603113000 | 1.391371000  |
| N | 1.127990000   | -0.682406000 | 2.325326000  |
| H | 0.190793000   | -3.043268000 | 0.494794000  |
| H | -3.266830000  | -4.150105000 | 2.614524000  |
| H | -2.524852000  | -2.200558000 | 1.077606000  |
| H | -2.668028000  | -1.904165000 | 2.814833000  |
| H | 2.274156000   | -1.736599000 | 0.793784000  |
| H | -0.635632000  | -0.187947000 | 3.477189000  |
| H | -0.565136000  | -3.827681000 | 3.605848000  |
| N | -2.436000000  | -6.029362000 | 1.101962000  |
| C | -2.240958000  | -6.991805000 | 0.032692000  |
| H | -2.835098000  | -6.330045000 | 1.986601000  |
| H | -1.727350000  | -6.489029000 | -0.784784000 |
| H | -3.200988000  | -7.372003000 | -0.325373000 |
| H | -1.633603000  | -7.833841000 | 0.375890000  |
| C | -9.889072000  | -1.712387000 | -1.501057000 |
| C | -9.013016000  | -0.844771000 | -0.616163000 |
| O | -8.756632000  | -1.137865000 | 0.535499000  |
| H | -10.236472000 | -1.204147000 | -2.402850000 |

|   |               |              |              |
|---|---------------|--------------|--------------|
| H | -10.746606000 | -2.051600000 | -0.920133000 |
| H | -9.317469000  | -2.596272000 | -1.795249000 |
| N | -8.529836000  | 0.297079000  | -1.213664000 |
| C | -7.484846000  | 1.108200000  | -0.595834000 |
| C | -7.972698000  | 2.451072000  | -0.064666000 |
| O | -7.173717000  | 3.245268000  | 0.411094000  |
| C | -6.352893000  | 1.367001000  | -1.605587000 |
| C | -5.684551000  | 0.098742000  | -2.121962000 |
| S | -4.490920000  | 0.545613000  | -3.427828000 |
| C | -3.911760000  | -1.121656000 | -3.858499000 |
| H | -7.118230000  | 0.542650000  | 0.264009000  |
| H | -6.767448000  | 1.930198000  | -2.451474000 |
| H | -5.620678000  | 2.021390000  | -1.134312000 |
| H | -5.161728000  | -0.425957000 | -1.317916000 |
| H | -6.419790000  | -0.591560000 | -2.545080000 |
| H | -3.102603000  | -1.005721000 | -4.579378000 |
| H | -4.715444000  | -1.711061000 | -4.305737000 |
| H | -3.515508000  | -1.601164000 | -2.965046000 |
| H | -8.657481000  | 0.397611000  | -2.209593000 |
| N | -9.305648000  | 2.676361000  | -0.151003000 |
| C | -9.928501000  | 3.877299000  | 0.372865000  |
| H | -9.874767000  | 1.925474000  | -0.507526000 |
| H | -9.131694000  | 4.540185000  | 0.706139000  |
| H | -10.578868000 | 3.647755000  | 1.222122000  |
| H | -10.516539000 | 4.380896000  | -0.398990000 |
| C | 8.322911000   | -0.379446000 | -3.533516000 |
| C | 8.059153000   | -0.746051000 | -2.090486000 |
| O | 8.864485000   | -0.493356000 | -1.198675000 |
| H | 7.525081000   | -0.684386000 | -4.212045000 |
| H | 9.263111000   | -0.836402000 | -3.846868000 |
| H | 8.445884000   | 0.703634000  | -3.593922000 |
| N | 6.871472000   | -1.361769000 | -1.840270000 |
| C | 6.431463000   | -1.681572000 | -0.490496000 |
| C | 7.008266000   | -3.018598000 | -0.047878000 |
| O | 6.322512000   | -4.027402000 | 0.030060000  |
| C | 4.898910000   | -1.595397000 | -0.418682000 |
| S | 4.402942000   | -0.118678000 | -1.437865000 |
| H | 6.862780000   | -0.901178000 | 0.143584000  |
| H | 4.395366000   | -2.474067000 | -0.814190000 |
| H | 4.587880000   | -1.461068000 | 0.617293000  |
| H | 6.260628000   | -1.594448000 | -2.607511000 |
| N | 8.327317000   | -2.960285000 | 0.251820000  |
| C | 9.096287000   | -4.145767000 | 0.586894000  |
| H | 8.810194000   | -2.092989000 | 0.035943000  |
| H | 8.396030000   | -4.958879000 | 0.769958000  |
| H | 9.693591000   | -3.971966000 | 1.485139000  |
| H | 9.765523000   | -4.433100000 | -0.230480000 |
| C | 4.533998000   | 1.499180000  | 2.938763000  |
| C | 3.620639000   | 2.437135000  | 2.182377000  |
| O | 2.533436000   | 2.011319000  | 1.764461000  |
| H | 5.466294000   | 1.961525000  | 3.266755000  |
| H | 4.769797000   | 0.653080000  | 2.289841000  |
| H | 4.000348000   | 1.120220000  | 3.812890000  |
| N | 4.006600000   | 3.712170000  | 2.060101000  |
| C | 3.197289000   | 4.668416000  | 1.350091000  |
| C | 3.981781000   | 5.967897000  | 1.221254000  |
| O | 4.959369000   | 6.163126000  | 1.939616000  |
| C | 1.813833000   | 4.934871000  | 2.018680000  |
| C | 0.625383000   | 4.769011000  | 1.070295000  |
| S | 0.466921000   | 5.944020000  | -0.320470000 |
| C | 0.108137000   | 7.478176000  | 0.590668000  |

|    |              |              |              |
|----|--------------|--------------|--------------|
| H  | 3.005329000  | 4.271595000  | 0.347269000  |
| H  | 1.680985000  | 4.209465000  | 2.823065000  |
| H  | 1.807001000  | 5.922788000  | 2.486639000  |
| H  | 0.673436000  | 3.789990000  | 0.595091000  |
| H  | -0.312078000 | 4.807985000  | 1.624994000  |
| H  | -0.083189000 | 8.253083000  | -0.151897000 |
| H  | 0.952974000  | 7.779853000  | 1.211874000  |
| H  | -0.782838000 | 7.351264000  | 1.207383000  |
| H  | 4.879011000  | 4.067145000  | 2.432887000  |
| N  | 3.514402000  | 6.834045000  | 0.300139000  |
| H  | 2.688945000  | 6.563117000  | -0.231851000 |
| C  | 4.143060000  | 8.117798000  | 0.047620000  |
| H  | 4.968974000  | 8.232433000  | 0.747151000  |
| H  | 3.431960000  | 8.935538000  | 0.193752000  |
| H  | 4.530426000  | 8.166983000  | -0.973413000 |
| Se | 2.232241000  | 0.234353000  | -1.281919000 |
| C  | 1.374638000  | -1.365538000 | -2.150962000 |
| C  | -0.076467000 | -1.504437000 | -2.111390000 |
| C  | -0.633131000 | -2.425043000 | -3.036128000 |
| C  | 0.058298000  | -2.945997000 | -4.102976000 |
| C  | 1.387599000  | -2.513563000 | -4.315119000 |
| C  | 2.011521000  | -1.706403000 | -3.405412000 |
| N  | -0.713204000 | 0.147453000  | -0.373656000 |
| C  | -1.067801000 | -0.932902000 | -1.185664000 |
| O  | -2.231386000 | -1.351161000 | -1.126579000 |
| C  | -1.551997000 | 0.932670000  | 0.428686000  |
| C  | -2.950154000 | 0.966200000  | 0.306412000  |
| C  | -3.705139000 | 1.769174000  | 1.156406000  |
| C  | -3.101024000 | 2.543411000  | 2.145081000  |
| C  | -1.712588000 | 2.531585000  | 2.250056000  |
| C  | -0.943630000 | 1.749800000  | 1.395587000  |
| H  | -1.666594000 | -2.692105000 | -2.872948000 |
| H  | -0.423866000 | -3.622950000 | -4.797011000 |
| H  | 1.919490000  | -2.808286000 | -5.214761000 |
| H  | 3.032012000  | -1.380399000 | -3.559503000 |
| H  | -3.415481000 | 0.370148000  | -0.458443000 |
| H  | -4.781512000 | 1.812506000  | 1.036103000  |
| H  | -3.702856000 | 3.158837000  | 2.802469000  |
| H  | -1.218137000 | 3.138930000  | 3.000846000  |
| H  | 0.136931000  | 1.771797000  | 1.471999000  |
| H  | 0.269125000  | 0.364637000  | -0.277603000 |
| O  | 2.045335000  | -2.578596000 | -0.989159000 |
| H  | 1.993692000  | -3.358154000 | -1.553916000 |
| H  | 1.700764000  | 0.158035000  | 2.436151000  |

**-SSeH**

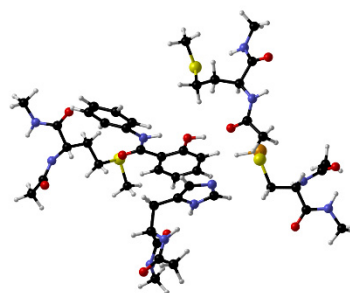

**E=-6670.41042555**  
**Nimag=0**

|   |               |              |              |    |              |              |              |
|---|---------------|--------------|--------------|----|--------------|--------------|--------------|
| C | -0.684839000  | -6.132112000 | 4.791750000  | H  | 8.015341000  | -0.702750000 | -4.162942000 |
| C | -1.530336000  | -5.905117000 | 3.557431000  | H  | 9.731078000  | -0.834963000 | -3.700326000 |
| O | -2.435774000  | -6.676853000 | 3.245954000  | H  | 8.875228000  | 0.685221000  | -3.459874000 |
| H | 0.090295000   | -5.377297000 | 4.932172000  | N  | 7.243788000  | -1.459414000 | -1.851052000 |
| H | -0.222001000  | -7.118055000 | 4.722256000  | C  | 6.732851000  | -1.821448000 | -0.537122000 |
| H | -1.342063000  | -6.138804000 | 5.663501000  | C  | 7.317482000  | -3.153589000 | -0.090362000 |
| N | -1.230580000  | -4.803168000 | 2.829197000  | O  | 6.647346000  | -4.177138000 | -0.076853000 |
| C | -2.022662000  | -4.378031000 | 1.680126000  | C  | 5.214251000  | -1.811422000 | -0.529388000 |
| C | -1.680262000  | -5.145765000 | 0.409222000  | S  | 4.536579000  | -0.114592000 | -0.655607000 |
| O | -1.096915000  | -4.628080000 | -0.545271000 | H  | 7.090600000  | -1.047619000 | 0.147865000  |
| C | -1.854981000  | -2.850657000 | 1.512768000  | H  | 4.788940000  | -2.458186000 | -1.296692000 |
| C | -0.435163000  | -2.406456000 | 1.638405000  | H  | 4.861324000  | -2.177381000 | 0.436903000  |
| N | 0.542697000   | -2.793974000 | 0.749290000  | H  | 6.672365000  | -1.659575000 | -2.656813000 |
| C | 0.232247000   | -1.674131000 | 2.596631000  | N  | 8.614571000  | -3.069964000 | 0.288306000  |
| C | 1.722622000   | -2.273824000 | 1.178287000  | C  | 9.393100000  | -4.243308000 | 0.642856000  |
| N | 1.577492000   | -1.590770000 | 2.297008000  | H  | 9.084978000  | -2.184281000 | 0.127832000  |
| H | 0.330596000   | -3.355374000 | -0.070348000 | H  | 8.707413000  | -5.082566000 | 0.745249000  |
| H | -3.068643000  | -4.594890000 | 1.914745000  | H  | 9.914082000  | -4.084757000 | 1.589950000  |
| H | -2.269679000  | -2.553373000 | 0.548754000  | H  | 10.131309000 | -4.480293000 | -0.129798000 |
| H | -2.438986000  | -2.351798000 | 2.288060000  | C  | 4.552457000  | 1.228565000  | 2.841953000  |
| H | 2.644367000   | -2.418625000 | 0.640690000  | C  | 3.660914000  | 2.161052000  | 2.053566000  |
| H | -0.188369000  | -1.181146000 | 3.459494000  | O  | 2.718735000  | 1.745005000  | 1.370603000  |
| H | -0.466371000  | -4.198800000 | 3.100176000  | H  | 5.008334000  | 1.715689000  | 3.705367000  |
| N | -2.095729000  | -6.425884000 | 0.424556000  | H  | 5.348277000  | 0.877493000  | 2.178664000  |
| C | -1.812416000  | -7.357396000 | -0.652578000 | H  | 3.960401000  | 0.367590000  | 3.153110000  |
| H | -2.485359000  | -6.768151000 | 1.301059000  | N  | 3.965906000  | 3.471858000  | 2.075525000  |
| H | -1.370345000  | -6.799121000 | -1.475513000 | C  | 3.229370000  | 4.400427000  | 1.247011000  |
| H | -2.732476000  | -7.837668000 | -0.994075000 | C  | 3.985526000  | 5.721626000  | 1.194204000  |
| H | -1.111294000  | -8.131764000 | -0.327384000 | O  | 4.913309000  | 5.924079000  | 1.974066000  |
| C | -9.492390000  | -2.235635000 | -2.523927000 | C  | 1.763801000  | 4.604723000  | 1.747651000  |
| C | -8.693746000  | -1.367530000 | -1.569039000 | C  | 0.690264000  | 4.333584000  | 0.693161000  |
| O | -8.501210000  | -1.683143000 | -0.411670000 | S  | 0.625711000  | 5.478040000  | -0.731325000 |
| H | -9.779060000  | -1.723951000 | -3.445080000 | C  | 0.038010000  | 6.991610000  | 0.092556000  |
| H | -10.386522000 | -2.589742000 | -2.010766000 | H  | 3.177078000  | 3.983953000  | 0.235456000  |
| H | -8.891052000  | -3.111153000 | -2.781326000 | H  | 1.592955000  | 3.905113000  | 2.567861000  |
| N | -8.205919000  | -0.200173000 | -2.111213000 | H  | 1.646879000  | 5.606259000  | 2.169890000  |
| C | -7.221495000  | 0.621654000  | -1.413673000 | H  | 0.845057000  | 3.348794000  | 0.256438000  |
| C | -7.774738000  | 1.939295000  | -0.883288000 | H  | -0.300596000 | 4.327164000  | 1.152412000  |
| O | -7.031170000  | 2.751323000  | -0.349964000 | H  | -0.107757000 | 7.742369000  | -0.684392000 |
| C | -6.013961000  | 0.881901000  | -2.330906000 | H  | 0.767822000  | 7.362089000  | 0.814244000  |
| C | -5.348701000  | -0.418045000 | -2.771743000 | H  | -0.915257000 | 6.804767000  | 0.588919000  |
| S | -4.117343000  | -0.084357000 | -4.079166000 | H  | 4.759687000  | 3.856016000  | 2.573434000  |
| C | -3.630018000  | -1.796465000 | -4.446723000 | N  | 3.550899000  | 6.597517000  | 0.266363000  |
| H | -6.900200000  | 0.049733000  | -0.539343000 | H  | 2.785874000  | 6.304756000  | -0.338847000 |
| H | -6.349403000  | 1.454617000  | -3.205195000 | C  | 4.159436000  | 7.902176000  | 0.080507000  |
| H | -5.300793000  | 1.499261000  | -1.787992000 | H  | 4.914201000  | 8.033853000  | 0.853639000  |
| H | -4.855510000  | -0.873862000 | -1.912477000 | H  | 3.412141000  | 8.695394000  | 0.167872000  |
| H | -6.080926000  | -1.119541000 | -3.179324000 | H  | 4.638008000  | 7.975723000  | -0.899974000 |
| H | -2.862821000  | -1.755060000 | -5.220413000 | Se | 4.641740000  | 0.396480000  | -2.813601000 |
| H | -4.478592000  | -2.374622000 | -4.818776000 | C  | -0.105267000 | 0.405164000  | -0.047932000 |
| H | -3.215915000  | -2.287200000 | -3.563445000 | C  | -1.426397000 | 0.049349000  | -0.384121000 |
| H | -8.288958000  | -0.070893000 | -3.108386000 | C  | -1.620592000 | -0.750785000 | -1.515429000 |
| N | -9.105900000  | 2.132971000  | -1.044048000 | C  | -0.565820000 | -1.198959000 | -2.293601000 |
| C | -9.790121000  | 3.305269000  | -0.531918000 | C  | 0.730246000  | -0.814844000 | -1.957993000 |
| H | -9.635678000  | 1.368811000  | -1.431776000 | C  | 0.957767000  | -0.009398000 | -0.852456000 |
| H | -9.030830000  | 4.030029000  | -0.242819000 | N  | -2.484661000 | 1.159745000  | 1.505915000  |
| H | -10.398527000 | 3.063158000  | 0.345172000  | C  | -2.672626000 | 0.449941000  | 0.354604000  |
| H | -10.432862000 | 3.741468000  | -1.300469000 | O  | -3.782036000 | 0.140214000  | -0.071251000 |
| C | 8.766621000   | -0.400729000 | -3.431834000 | C  | -3.469804000 | 1.719853000  | 2.341718000  |
| C | 8.427210000   | -0.807420000 | -2.015487000 | C  | -4.758657000 | 2.037332000  | 1.900299000  |
| O | 9.173142000   | -0.562144000 | -1.073205000 | C  | -5.653512000 | 2.641445000  | 2.777147000  |

|   |              |              |              |
|---|--------------|--------------|--------------|
| C | -5.289418000 | 2.932234000  | 4.089903000  |
| C | -4.003337000 | 2.619149000  | 4.526087000  |
| C | -3.098823000 | 2.016593000  | 3.660164000  |
| H | -2.639266000 | -1.004764000 | -1.762375000 |
| H | -0.751410000 | -1.834268000 | -3.149938000 |
| H | 1.572439000  | -1.165140000 | -2.545289000 |
| H | 1.960184000  | 0.270909000  | -0.564775000 |
| H | -5.060017000 | 1.834815000  | 0.886454000  |
| H | -6.638691000 | 2.894484000  | 2.404592000  |
| H | -5.995586000 | 3.401990000  | 4.764595000  |
| H | -3.701999000 | 2.841070000  | 5.543702000  |
| H | -2.098600000 | 1.767270000  | 3.999730000  |
| H | -1.519947000 | 1.297441000  | 1.782985000  |
| O | 0.141323000  | 1.146899000  | 1.064665000  |
| H | 1.105276000  | 1.210735000  | 1.241211000  |
| H | 3.214987000  | 0.151865000  | -3.113957000 |

## EbSeS

RC

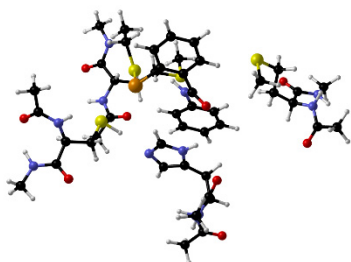

E= -7072.02277581

Nimag=0

|   |              |              |              |
|---|--------------|--------------|--------------|
| C | 0.937879000  | -6.656753000 | -4.735421000 |
| C | 1.961493000  | -6.236086000 | -3.696771000 |
| O | 3.152233000  | -6.437014000 | -3.840624000 |
| H | -0.093763000 | -6.583124000 | -4.386168000 |
| H | 1.147939000  | -7.683500000 | -5.036537000 |
| H | 1.058792000  | -6.023961000 | -5.617979000 |
| N | 1.437853000  | -5.627153000 | -2.580276000 |
| C | 2.283383000  | -4.950074000 | -1.602996000 |
| C | 2.041010000  | -5.430692000 | -0.177482000 |
| O | 2.458231000  | -4.778702000 | 0.771574000  |
| C | 2.111544000  | -3.411555000 | -1.672607000 |
| C | 0.786583000  | -2.928968000 | -1.174019000 |
| N | 0.586054000  | -2.569617000 | 0.143105000  |
| C | -0.441122000 | -2.742492000 | -1.773399000 |
| C | -0.706330000 | -2.182218000 | 0.282843000  |
| N | -1.363783000 | -2.278513000 | -0.857302000 |
| H | 1.299768000  | -2.550358000 | 0.861184000  |
| H | 3.310754000  | -5.207722000 | -1.870155000 |
| H | 2.905085000  | -2.951166000 | -1.084663000 |
| H | 2.253876000  | -3.098927000 | -2.708309000 |
| H | -1.108774000 | -1.815849000 | 1.212605000  |
| H | -0.696629000 | -2.865058000 | -2.814775000 |
| H | 0.471062000  | -5.330827000 | -2.605975000 |
| N | 1.368569000  | -6.598075000 | -0.051799000 |
| C | 1.086059000  | -7.202385000 | 1.236314000  |
| H | 1.602458000  | -8.160484000 | 1.345525000  |

|   |              |              |              |
|---|--------------|--------------|--------------|
| H | 0.011979000  | -7.359838000 | 1.364732000  |
| H | 1.088859000  | -7.061331000 | -0.901740000 |
| H | 1.442804000  | -6.517616000 | 2.003754000  |
| H | 10.275836000 | -1.065271000 | 2.319064000  |
| C | 9.687466000  | -1.843320000 | 1.828468000  |
| C | 8.727564000  | -1.309647000 | 0.782422000  |
| O | 8.162008000  | -2.035390000 | -0.011737000 |
| H | 9.110716000  | -2.380366000 | 2.585438000  |
| H | 10.356310000 | -2.561869000 | 1.354419000  |
| N | 8.548652000  | 0.055709000  | 0.794974000  |
| C | 7.499521000  | 0.690056000  | 0.002480000  |
| C | 7.979209000  | 1.871295000  | -0.833041000 |
| O | 7.207161000  | 2.748979000  | -1.184665000 |
| C | 6.222168000  | 0.982564000  | 0.801622000  |
| C | 6.413790000  | 1.934501000  | 1.977036000  |
| S | 4.983363000  | 1.999005000  | 3.112586000  |
| C | 4.994766000  | 0.278813000  | 3.727505000  |
| H | 7.232304000  | -0.079855000 | -0.730583000 |
| H | 5.480960000  | 1.399455000  | 0.120123000  |
| H | 5.846299000  | 0.019472000  | 1.154132000  |
| H | 7.287693000  | 1.663886000  | 2.579020000  |
| H | 6.554604000  | 2.956562000  | 1.621347000  |
| H | 4.509888000  | 0.277467000  | 4.703734000  |
| H | 6.023693000  | -0.062102000 | 3.858458000  |
| H | 4.448457000  | -0.393657000 | 3.066782000  |
| H | 8.946613000  | 0.578288000  | 1.559737000  |
| N | 9.294533000  | 1.838193000  | -1.173586000 |
| C | 9.891693000  | 2.811369000  | -2.069463000 |
| H | 10.157269000 | 2.359596000  | -3.030045000 |
| H | 10.788057000 | 3.250971000  | -1.624445000 |
| H | 9.832128000  | 1.043800000  | -0.864875000 |
| H | 9.154487000  | 3.593941000  | -2.240772000 |
| H | -7.448104000 | -0.245622000 | 3.957196000  |
| C | -8.237308000 | -0.083495000 | 3.221176000  |
| C | -8.018168000 | -0.830353000 | 1.922203000  |
| O | -8.858017000 | -0.824430000 | 1.027095000  |
| H | -8.299812000 | 0.983349000  | 2.996355000  |
| H | -9.196041000 | -0.388132000 | 3.643200000  |
| N | -6.842746000 | -1.499048000 | 1.811716000  |
| C | -6.399914000 | -2.127538000 | 0.575854000  |
| C | -6.968443000 | -3.534775000 | 0.464241000  |
| O | -6.265688000 | -4.532037000 | 0.549202000  |
| C | -4.879182000 | -2.150549000 | 0.471111000  |
| S | -4.233720000 | -0.515989000 | -0.048105000 |
| H | -3.094407000 | -1.000744000 | -0.610003000 |
| H | -6.812155000 | -1.531053000 | -0.243229000 |
| H | -4.434681000 | -2.464646000 | 1.418780000  |
| H | -4.584731000 | -2.887614000 | -0.270950000 |
| H | -6.185508000 | -1.464719000 | 2.575142000  |
| N | -8.309043000 | -3.559798000 | 0.260519000  |
| C | -9.062037000 | -4.798578000 | 0.211011000  |
| H | -9.725411000 | -4.896685000 | 1.076383000  |
| H | -8.798307000 | -2.669823000 | 0.275336000  |
| H | -9.665020000 | -4.848345000 | -0.699465000 |
| H | -8.350825000 | -5.622801000 | 0.215477000  |
| H | -4.897269000 | -0.375275000 | -2.877715000 |
| C | -4.375475000 | 0.134148000  | -3.691022000 |
| C | -3.522068000 | 1.221645000  | -3.079655000 |
| O | -2.524436000 | 0.972162000  | -2.408914000 |
| H | -5.102722000 | 0.511450000  | -4.412014000 |
| H | -3.721363000 | -0.592943000 | -4.173287000 |



|    |              |              |              |
|----|--------------|--------------|--------------|
| N  | -3.926251000 | 2.494675000  | -3.304430000 |
| C  | -3.203121000 | 3.621718000  | -2.725205000 |
| C  | -3.995262000 | 4.909703000  | -2.908126000 |
| O  | -4.969870000 | 4.968800000  | -3.642743000 |
| C  | -1.769271000 | 3.764147000  | -3.328862000 |
| C  | -0.698329000 | 3.942357000  | -2.255131000 |
| S  | 1.007218000  | 3.999025000  | -2.889709000 |
| C  | 1.006718000  | 5.660039000  | -3.635836000 |
| H  | -3.093935000 | 3.421380000  | -1.653300000 |
| H  | -1.541551000 | 2.852471000  | -3.876989000 |
| H  | -1.747023000 | 4.588830000  | -4.046087000 |
| H  | -0.858823000 | 4.841836000  | -1.648829000 |
| H  | -0.724884000 | 3.086133000  | -1.581364000 |
| H  | 2.014900000  | 5.835778000  | -4.012069000 |
| H  | 0.773965000  | 6.422876000  | -2.888886000 |
| H  | 0.305797000  | 5.732002000  | -4.468854000 |
| H  | -4.756909000 | 2.720843000  | -3.833342000 |
| N  | -3.519264000 | 5.969692000  | -2.202314000 |
| H  | -3.390228000 | 7.988734000  | -2.815419000 |
| H  | -2.692049000 | 5.839319000  | -1.643008000 |
| C  | -4.083324000 | 7.304075000  | -2.317934000 |
| H  | -4.333358000 | 7.703282000  | -1.332159000 |
| H  | -4.990791000 | 7.225656000  | -2.913337000 |
| Se | -2.278972000 | 0.626303000  | 2.451543000  |
| C  | -0.876018000 | 1.153308000  | 3.692230000  |
| C  | 0.489710000  | 0.891897000  | 3.486247000  |
| C  | 1.394106000  | 1.198838000  | 4.506292000  |
| C  | 0.973414000  | 1.782034000  | 5.694830000  |
| C  | -0.378260000 | 2.045910000  | 5.895038000  |
| C  | -1.295368000 | 1.723152000  | 4.900136000  |
| N  | 0.791610000  | 0.887158000  | 1.084238000  |
| C  | 1.099275000  | 0.267288000  | 2.251056000  |
| O  | 1.867298000  | -0.683451000 | 2.350383000  |
| C  | 1.309211000  | 0.566171000  | -0.197444000 |
| C  | 2.663187000  | 0.276058000  | -0.373999000 |
| C  | 3.145575000  | 0.023442000  | -1.653185000 |
| C  | 2.289775000  | 0.062686000  | -2.753348000 |
| C  | 0.940160000  | 0.346188000  | -2.565225000 |
| C  | 0.444124000  | 0.593322000  | -1.289781000 |
| H  | 2.437464000  | 0.973824000  | 4.343096000  |
| H  | 1.698996000  | 2.025385000  | 6.461872000  |
| H  | -0.720178000 | 2.493100000  | 6.821105000  |
| H  | -2.352164000 | 1.901361000  | 5.056247000  |
| H  | 3.320435000  | 0.257549000  | 0.482151000  |
| H  | 4.198711000  | -0.193754000 | -1.790959000 |
| H  | 2.675003000  | -0.125784000 | -3.748544000 |
| H  | 0.253713000  | 0.366886000  | -3.402159000 |
| H  | -0.614867000 | 0.769591000  | -1.159061000 |
| H  | 0.081737000  | 1.610720000  | 1.110586000  |
| S  | -2.196330000 | 2.361163000  | 1.056407000  |
| C  | -2.751397000 | 3.745330000  | 2.127864000  |
| C  | -2.732665000 | 5.042068000  | 1.322716000  |
| H  | -3.755948000 | 3.513016000  | 2.483992000  |
| H  | -2.079464000 | 3.807459000  | 2.984709000  |
| H  | -1.729855000 | 5.251850000  | 0.940860000  |
| H  | -3.031689000 | 5.879128000  | 1.959141000  |
| H  | -3.426183000 | 4.996270000  | 0.480089000  |

TS1

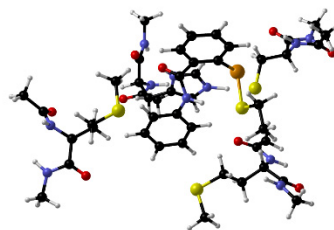

E= -7072.00819400

Nimag= -804.8

|   |               |              |              |
|---|---------------|--------------|--------------|
| C | -1.103043000  | 6.273640000  | -5.093945000 |
| C | -2.107859000  | 5.909593000  | -4.018135000 |
| O | -3.304389000  | 6.066867000  | -4.161389000 |
| H | -0.068549000  | 6.265843000  | -4.745555000 |
| H | -1.349224000  | 7.262760000  | -5.480805000 |
| H | -1.203953000  | 5.563819000  | -5.918560000 |
| N | -1.562899000  | 5.397532000  | -2.860658000 |
| C | -2.395187000  | 4.786182000  | -1.830148000 |
| C | -2.125337000  | 5.349958000  | -0.440489000 |
| O | -2.470504000  | 4.725400000  | 0.556912000  |
| C | -2.165917000  | 3.244323000  | -1.799556000 |
| C | -0.822900000  | 2.815577000  | -1.277438000 |
| N | -0.593629000  | 2.663203000  | 0.080643000  |
| C | 0.362980000   | 2.453981000  | -1.876239000 |
| C | 0.657829000   | 2.228907000  | 0.274896000  |
| N | 1.269435000   | 2.098540000  | -0.892990000 |
| H | -1.289047000  | 2.803787000  | 0.806499000  |
| H | -3.430765000  | 4.994566000  | -2.103386000 |
| H | -2.935973000  | 2.789963000  | -1.176989000 |
| H | -2.298979000  | 2.858628000  | -2.810678000 |
| H | 1.090754000   | 1.987101000  | 1.228509000  |
| H | 0.607880000   | 2.368422000  | -2.920882000 |
| H | -0.587858000  | 5.131773000  | -2.867051000 |
| N | -1.509442000  | 6.551007000  | -0.400109000 |
| C | -1.218062000  | 7.243411000  | 0.842728000  |
| H | -1.784130000  | 8.176080000  | 0.914129000  |
| H | -0.151177000  | 7.466519000  | 0.920473000  |
| H | -1.290936000  | 6.985075000  | -1.283328000 |
| H | -1.509727000  | 6.587661000  | 1.660960000  |
| H | -10.337654000 | 1.200960000  | 2.455090000  |
| C | -9.753862000  | 1.943791000  | 1.907858000  |
| C | -8.815001000  | 1.340825000  | 0.880593000  |
| O | -8.258214000  | 2.013567000  | 0.034856000  |
| H | -9.162100000  | 2.523280000  | 2.620634000  |
| H | -10.427432000 | 2.635329000  | 1.401371000  |
| N | -8.647068000  | -0.023095000 | 0.970921000  |
| C | -7.615665000  | -0.711270000 | 0.200480000  |
| C | -8.116625000  | -1.937141000 | -0.554300000 |
| O | -7.349734000  | -2.824484000 | -0.892463000 |
| C | -6.320457000  | -0.979251000 | 0.981657000  |
| C | -6.475288000  | -1.925238000 | 2.166675000  |
| S | -4.920833000  | -2.223498000 | 3.078069000  |
| C | -4.625306000  | -0.577789000 | 3.799916000  |
| H | -7.357250000  | 0.012063000  | -0.581442000 |
| H | -5.594999000  | -1.404825000 | 0.288356000  |
| H | -5.936799000  | -0.011552000 | 1.314653000  |
| H | -7.220673000  | -1.563291000 | 2.883417000  |



|   |               |              |              |
|---|---------------|--------------|--------------|
| H | -6.788184000  | -2.911742000 | 1.819134000  |
| H | -3.850670000  | -0.710865000 | 4.555014000  |
| H | -5.527791000  | -0.205058000 | 4.289274000  |
| H | -4.268039000  | 0.145168000  | 3.066444000  |
| H | -9.021436000  | -0.491601000 | 1.781837000  |
| N | -9.445043000  | -1.934526000 | -0.841002000 |
| C | -10.066735000 | -2.959545000 | -1.659184000 |
| H | -10.372503000 | -2.563024000 | -2.632136000 |
| H | -10.941605000 | -3.379952000 | -1.156717000 |
| H | -9.977900000  | -1.128661000 | -0.554630000 |
| H | -9.329657000  | -3.745311000 | -1.815717000 |
| H | 7.368316000   | 0.319184000  | 3.825806000  |
| C | 8.144336000   | 0.103546000  | 3.089181000  |
| C | 7.938833000   | 0.815520000  | 1.766779000  |
| O | 8.790132000   | 0.777319000  | 0.881963000  |
| H | 8.165611000   | -0.972115000 | 2.900312000  |
| H | 9.117242000   | 0.387376000  | 3.492496000  |
| N | 6.768512000   | 1.483834000  | 1.630482000  |
| C | 6.307930000   | 2.039985000  | 0.366755000  |
| C | 6.882680000   | 3.434002000  | 0.160953000  |
| O | 6.209457000   | 4.454968000  | 0.209233000  |
| C | 4.761615000   | 2.115433000  | 0.338956000  |
| S | 3.924755000   | 0.778528000  | -0.589725000 |
| H | 2.392610000   | 1.580185000  | -0.900105000 |
| H | 6.666098000   | 1.388943000  | -0.433593000 |
| H | 4.393238000   | 2.139421000  | 1.374483000  |
| H | 4.492227000   | 3.077595000  | -0.089090000 |
| H | 6.088228000   | 1.425003000  | 2.371596000  |
| N | 8.218065000   | 3.427494000  | -0.083128000 |
| C | 8.989130000   | 4.647698000  | -0.215845000 |
| H | 9.651524000   | 4.799248000  | 0.643308000  |
| H | 8.695823000   | 2.533284000  | -0.012090000 |
| H | 9.596921000   | 4.623519000  | -1.124356000 |
| H | 8.290735000   | 5.480957000  | -0.272687000 |
| H | 4.484631000   | 0.203512000  | -3.195215000 |
| C | 4.116833000   | -0.509790000 | -3.937719000 |
| C | 3.264456000   | -1.520413000 | -3.206810000 |
| O | 2.206408000   | -1.211322000 | -2.663417000 |
| H | 4.958324000   | -0.957901000 | -4.469143000 |
| H | 3.486030000   | 0.031777000  | -4.644980000 |
| N | 3.740216000   | -2.789933000 | -3.185665000 |
| C | 3.020663000   | -3.875071000 | -2.527441000 |
| C | 3.801939000   | -5.177186000 | -2.645877000 |
| O | 4.739008000   | -5.302590000 | -3.419280000 |
| C | 1.584734000   | -4.077189000 | -3.114988000 |
| C | 0.518977000   | -4.138243000 | -2.024215000 |
| S | -1.190844000  | -4.253751000 | -2.639720000 |
| C | -1.188575000  | -5.965579000 | -3.260013000 |
| H | 2.919328000   | -3.611646000 | -1.468729000 |
| H | 1.355304000   | -3.233074000 | -3.760143000 |
| H | 1.561411000   | -4.977964000 | -3.733709000 |
| H | 0.681758000   | -4.970646000 | -1.329093000 |
| H | 0.550591000   | -3.216807000 | -1.443248000 |
| H | -2.202374000  | -6.177937000 | -3.600622000 |
| H | -0.933184000  | -6.667283000 | -2.462348000 |
| H | -0.503430000  | -6.094148000 | -4.099156000 |
| H | 4.584939000   | -3.053386000 | -3.673006000 |
| N | 3.356111000   | -6.174704000 | -1.835358000 |
| H | 3.182379000   | -8.229776000 | -2.303459000 |
| H | 2.558011000   | -5.992970000 | -1.248532000 |
| C | 3.900654000   | -7.521132000 | -1.880405000 |

|    |              |              |              |
|----|--------------|--------------|--------------|
| H  | 4.184237000  | -7.855125000 | -0.879645000 |
| H  | 4.785381000  | -7.495257000 | -2.513541000 |
| Se | 2.614557000  | -0.272206000 | 2.108113000  |
| C  | 1.424844000  | -0.584327000 | 3.641078000  |
| C  | 0.049033000  | -0.279408000 | 3.634318000  |
| C  | -0.656763000 | -0.296702000 | 4.840881000  |
| C  | -0.040628000 | -0.661214000 | 6.031902000  |
| C  | 1.311293000  | -0.990891000 | 6.035679000  |
| C  | 2.036972000  | -0.936279000 | 4.849054000  |
| N  | -0.606958000 | -0.685617000 | 1.337866000  |
| C  | -0.762937000 | 0.114406000  | 2.422543000  |
| O  | -1.540180000 | 1.064719000  | 2.472270000  |
| C  | -1.246188000 | -0.534033000 | 0.080708000  |
| C  | -2.608417000 | -0.241250000 | -0.015578000 |
| C  | -3.199574000 | -0.150445000 | -1.271244000 |
| C  | -2.447281000 | -0.356270000 | -2.427523000 |
| C  | -1.089749000 | -0.645730000 | -2.322462000 |
| C  | -0.485128000 | -0.727605000 | -1.072486000 |
| H  | -1.698680000 | -0.004857000 | 4.823784000  |
| H  | -0.612073000 | -0.680556000 | 6.952296000  |
| H  | 1.804637000  | -1.273415000 | 6.958534000  |
| H  | 3.098775000  | -1.151151000 | 4.853525000  |
| H  | -3.191534000 | -0.104222000 | 0.882396000  |
| H  | -4.259015000 | 0.066526000  | -1.344796000 |
| H  | -2.920823000 | -0.301518000 | -3.400651000 |
| H  | -0.478474000 | -0.804665000 | -3.201638000 |
| H  | 0.578926000  | -0.915523000 | -1.015440000 |
| H  | 0.118243000  | -1.396008000 | 1.379308000  |
| S  | 2.298360000  | -2.206154000 | 1.045162000  |
| C  | 2.978426000  | -3.420383000 | 2.241504000  |
| C  | 2.841258000  | -4.825933000 | 1.661146000  |
| H  | 4.024266000  | -3.164956000 | 2.418187000  |
| H  | 2.430186000  | -3.329667000 | 3.180028000  |
| H  | 1.795918000  | -5.061199000 | 1.443205000  |
| H  | 3.208376000  | -5.562824000 | 2.380475000  |
| H  | 3.423254000  | -4.934351000 | 0.743228000  |

IP

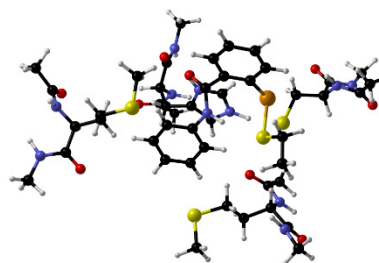

**E= -7072.00910189**

**Nimag=0**

|   |              |             |              |
|---|--------------|-------------|--------------|
| C | -1.110629000 | 6.172831000 | -5.185287000 |
| C | -2.117397000 | 5.810261000 | -4.111565000 |
| O | -3.316700000 | 5.911916000 | -4.277279000 |
| H | -0.082834000 | 6.222239000 | -4.820997000 |
| H | -1.390757000 | 7.134667000 | -5.615346000 |
| H | -1.168316000 | 5.427531000 | -5.982300000 |

|   |               |              |              |    |              |              |              |
|---|---------------|--------------|--------------|----|--------------|--------------|--------------|
| N | -1.571774000  | 5.366468000  | -2.925052000 | O  | 6.199463000  | 4.471689000  | 0.124857000  |
| C | -2.401819000  | 4.766744000  | -1.885992000 | C  | 4.764709000  | 2.114058000  | 0.290570000  |
| C | -2.131818000  | 5.348871000  | -0.503945000 | S  | 3.960257000  | 0.679451000  | -0.509204000 |
| O | -2.423214000  | 4.713759000  | 0.504132000  | H  | 2.197447000  | 1.539278000  | -1.042899000 |
| C | -2.204113000  | 3.222370000  | -1.844836000 | H  | 6.672772000  | 1.404339000  | -0.454675000 |
| C | -0.864522000  | 2.765472000  | -1.343332000 | H  | 4.387413000  | 2.240456000  | 1.316983000  |
| N | -0.601752000  | 2.640840000  | 0.013296000  | H  | 4.491719000  | 3.028929000  | -0.230083000 |
| C | 0.286169000   | 2.349510000  | -1.968862000 | H  | 6.073972000  | 1.431791000  | 2.331247000  |
| C | 0.633764000   | 2.172317000  | 0.194426000  | N  | 8.219280000  | 3.450433000  | -0.109505000 |
| N | 1.199091000   | 1.994293000  | -0.992730000 | C  | 8.984242000  | 4.671966000  | -0.259400000 |
| H | -1.275830000  | 2.820217000  | 0.752280000  | H  | 9.649886000  | 4.835431000  | 0.595052000  |
| H | -3.435923000  | 4.982291000  | -2.161710000 | H  | 8.700366000  | 2.559698000  | -0.016763000 |
| H | -2.973111000  | 2.789082000  | -1.205968000 | H  | 9.588587000  | 4.642172000  | -1.170390000 |
| H | -2.361682000  | 2.831357000  | -2.850284000 | H  | 8.281420000  | 5.501197000  | -0.322169000 |
| H | 1.095585000   | 1.929932000  | 1.134612000  | H  | 4.507184000  | 0.153476000  | -3.128576000 |
| H | 0.504129000   | 2.225156000  | -3.014594000 | C  | 4.135605000  | -0.535976000 | -3.892738000 |
| H | -0.587680000  | 5.138132000  | -2.907726000 | C  | 3.265908000  | -1.547311000 | -3.185127000 |
| N | -1.583996000  | 6.582536000  | -0.483565000 | O  | 2.196334000  | -1.236412000 | -2.664674000 |
| C | -1.314500000  | 7.304008000  | 0.748390000  | H  | 4.975249000  | -0.985120000 | -4.426288000 |
| H | -1.937202000  | 8.199554000  | 0.821857000  | H  | 3.518114000  | 0.029675000  | -4.592673000 |
| H | -0.262759000  | 7.594712000  | 0.803558000  | N  | 3.743046000  | -2.816849000 | -3.150949000 |
| H | -1.403496000  | 7.020287000  | -1.373696000 | C  | 3.025791000  | -3.894591000 | -2.478295000 |
| H | -1.549053000  | 6.639637000  | 1.577831000  | C  | 3.808783000  | -5.196977000 | -2.580882000 |
| H | -10.335124000 | 1.223962000  | 2.452930000  | O  | 4.709411000  | -5.347400000 | -3.392365000 |
| C | -9.740129000  | 1.961554000  | 1.910753000  | C  | 1.597655000  | -4.113809000 | -3.077701000 |
| C | -8.797761000  | 1.350166000  | 0.891744000  | C  | 0.528694000  | -4.260841000 | -1.998596000 |
| O | -8.226405000  | 2.018254000  | 0.051812000  | S  | -1.173160000 | -4.390569000 | -2.636577000 |
| H | -9.149713000  | 2.536125000  | 2.628608000  | C  | -1.118661000 | -6.067645000 | -3.343396000 |
| H | -10.403305000 | 2.658698000  | 1.398242000  | H  | 2.914299000  | -3.613973000 | -1.425030000 |
| N | -8.644266000  | -0.015300000 | 0.982113000  | H  | 1.344759000  | -3.245737000 | -3.680418000 |
| C | -7.612610000  | -0.711742000 | 0.219480000  | H  | 1.606503000  | -4.983240000 | -3.740127000 |
| C | -8.112482000  | -1.947848000 | -0.519139000 | H  | 0.707418000  | -5.125636000 | -1.349528000 |
| O | -7.344570000  | -2.837852000 | -0.847356000 | H  | 0.527895000  | -3.371287000 | -1.367896000 |
| C | -6.317126000  | -0.970879000 | 1.003504000  | H  | -2.122780000 | -6.288363000 | -3.706645000 |
| C | -6.471335000  | -1.908047000 | 2.195698000  | H  | -0.852640000 | -6.802306000 | -2.579806000 |
| S | -4.913911000  | -2.209673000 | 3.100486000  | H  | -0.421206000 | -6.134228000 | -6.179459000 |
| C | -4.607830000  | -0.563662000 | 3.816123000  | H  | 4.593749000  | -3.080602000 | -3.627070000 |
| H | -7.354291000  | 0.002183000  | -0.570949000 | N  | 3.402156000  | -6.166984000 | -1.718609000 |
| H | -5.590649000  | -1.400947000 | 0.314083000  | H  | 3.209508000  | -8.244863000 | -2.052337000 |
| H | -5.935063000  | 0.000071000  | 1.328870000  | H  | 2.651322000  | -5.956821000 | -1.081480000 |
| H | -7.211752000  | -1.537620000 | 2.913252000  | C  | 3.955111000  | -7.510500000 | -1.733861000 |
| H | -6.790671000  | -2.895143000 | 1.855794000  | H  | 4.328098000  | -7.786709000 | -0.744638000 |
| H | -3.815786000  | -0.695144000 | 4.553204000  | H  | 4.781927000  | -7.515275000 | -2.441444000 |
| H | -5.500103000  | -0.192855000 | 4.325327000  | Se | 2.615840000  | -0.177191000 | 2.109979000  |
| H | -4.269079000  | 0.160365000  | 3.074865000  | C  | 1.419480000  | -0.490293000 | 3.654694000  |
| H | -9.025842000  | -0.479717000 | 1.792114000  | C  | 0.043961000  | -0.183578000 | 3.644200000  |
| N | -9.441548000  | -1.951428000 | -0.803427000 | C  | -0.662773000 | -0.168399000 | 4.850301000  |
| C | -10.062735000 | -2.988514000 | -1.606801000 | C  | -0.046554000 | -0.505520000 | 6.049548000  |
| H | -10.367974000 | -2.606549000 | -2.585735000 | C  | 1.304669000  | -0.838358000 | 6.059472000  |
| H | -10.937832000 | -3.401334000 | -1.098552000 | C  | 2.030008000  | -0.813071000 | 4.871232000  |
| H | -9.975029000  | -1.141976000 | -0.528477000 | N  | -0.611226000 | -0.656374000 | 1.360427000  |
| H | -9.325583000  | -3.776497000 | -1.751317000 | C  | -0.764167000 | 0.177732000  | 2.421255000  |
| H | 7.362929000   | 0.370285000  | 3.812121000  | O  | -1.535819000 | 1.134953000  | 2.436251000  |
| C | 8.122331000   | 0.122625000  | 3.068229000  | C  | -1.252912000 | -0.547331000 | 0.101452000  |
| C | 7.936765000   | 0.849885000  | 1.750888000  | C  | -2.606727000 | -0.218317000 | -0.004888000 |
| O | 8.801121000   | 0.818957000  | 0.878212000  | C  | -3.200980000 | -0.167509000 | -1.261504000 |
| H | 8.090513000   | -0.952183000 | 2.874577000  | C  | -2.461177000 | -0.446782000 | -2.410325000 |
| H | 9.110752000   | 0.359200000  | 3.463528000  | C  | -1.112141000 | -0.771545000 | -2.296487000 |
| N | 6.769793000   | 1.522073000  | 1.607336000  | C  | -0.504192000 | -0.815971000 | -1.046167000 |
| C | 6.306639000   | 2.061979000  | 0.337397000  | H  | -1.704267000 | 0.125160000  | 4.827399000  |
| C | 6.879830000   | 3.453619000  | 0.112989000  | H  | -0.616925000 | -0.500759000 | 6.970826000  |

|   |              |              |              |
|---|--------------|--------------|--------------|
| H | 1.797890000  | -1.099697000 | 6.988779000  |
| H | 3.092139000  | -1.027546000 | 4.881847000  |
| H | -3.180897000 | -0.020231000 | 0.887213000  |
| H | -4.254293000 | 0.076090000  | -1.340361000 |
| H | -2.937630000 | -0.423009000 | -3.383243000 |
| H | -0.510017000 | -0.986713000 | -3.169923000 |
| H | 0.554395000  | -1.032975000 | -0.985701000 |
| H | 0.116860000  | -1.363577000 | 1.424060000  |
| S | 2.298300000  | -2.143279000 | 1.101310000  |
| C | 3.010913000  | -3.318449000 | 2.316169000  |
| C | 2.906724000  | -4.737047000 | 1.761190000  |
| H | 4.051205000  | -3.034432000 | 2.481655000  |
| H | 2.465826000  | -3.224454000 | 3.256214000  |
| H | 1.867377000  | -5.000441000 | 1.546027000  |
| H | 3.289767000  | -5.453130000 | 2.493155000  |
| H | 3.493236000  | -4.846287000 | 0.846113000  |

TCI

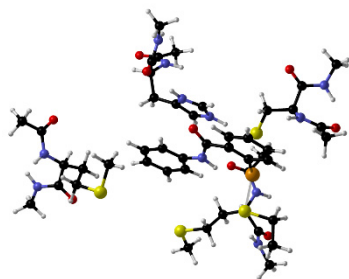

E= -7072.02809124

Nimag=0

|   |              |             |              |
|---|--------------|-------------|--------------|
| C | -2.274361000 | 6.162315000 | -5.007601000 |
| C | -3.191391000 | 5.776895000 | -3.865092000 |
| O | -4.401131000 | 5.856258000 | -3.935876000 |
| H | -1.234524000 | 6.294586000 | -4.703165000 |
| H | -2.644081000 | 7.083594000 | -5.457154000 |
| H | -2.320830000 | 5.380855000 | -5.770421000 |
| N | -2.549620000 | 5.334588000 | -2.723974000 |
| C | -3.293551000 | 4.691145000 | -1.646449000 |
| C | -3.014765000 | 5.311540000 | -0.282911000 |
| O | -3.130984000 | 4.655200000 | 0.752305000  |
| C | -3.008318000 | 3.161042000 | -1.597865000 |
| C | -1.590636000 | 2.805119000 | -1.259873000 |
| N | -1.042336000 | 3.103018000 | -0.017631000 |
| C | -0.592710000 | 2.166110000 | -1.949542000 |
| C | 0.218030000  | 2.675457000 | 0.038730000  |
| N | 0.513271000  | 2.108100000 | -1.121831000 |
| H | -1.585947000 | 3.525476000 | 0.732470000  |
| H | -4.350405000 | 4.843585000 | -1.878294000 |
| H | -3.669295000 | 2.710497000 | -0.856220000 |
| H | -3.259151000 | 2.730732000 | -2.567572000 |
| H | 0.869916000  | 2.744607000 | 0.889007000  |
| H | -0.588676000 | 1.714737000 | -2.925213000 |
| H | -1.563702000 | 5.122535000 | -2.785264000 |
| N | -2.668563000 | 6.611767000 | -0.302654000 |
| C | -2.436906000 | 7.392520000 | 0.901731000  |
| H | -3.136489000 | 8.229715000 | 0.957503000  |
| H | -1.414981000 | 7.778892000 | 0.922952000  |
| H | -2.589178000 | 7.050771000 | -1.207484000 |
| H | -2.593036000 | 6.738879000 | 1.757397000  |

|   |               |              |              |
|---|---------------|--------------|--------------|
| H | -10.766963000 | 0.631726000  | 3.050889000  |
| C | -10.239483000 | 1.407791000  | 2.492889000  |
| C | -9.283946000  | 0.862149000  | 1.448783000  |
| O | -8.767882000  | 1.572084000  | 0.606794000  |
| H | -9.672552000  | 2.024469000  | 3.194420000  |
| H | -10.963740000 | 2.055227000  | 1.997840000  |
| N | -9.053046000  | -0.492912000 | 1.518696000  |
| C | -8.002277000  | -1.122422000 | 0.724084000  |
| C | -8.437657000  | -2.402991000 | 0.021007000  |
| O | -7.615903000  | -3.222278000 | -0.355707000 |
| C | -6.678176000  | -1.310112000 | 1.481649000  |
| C | -6.779068000  | -2.232112000 | 2.692987000  |
| S | -5.176132000  | -2.603984000 | 3.483346000  |
| C | -4.649156000  | -0.941549000 | 4.000835000  |
| H | -7.810029000  | -0.401282000 | -0.077221000 |
| H | -5.949663000  | -1.723811000 | 0.784325000  |
| H | -6.330401000  | -0.319850000 | 1.785024000  |
| H | -7.454242000  | -1.825227000 | 3.453801000  |
| H | -7.158073000  | -3.210020000 | 2.387975000  |
| H | -3.747886000  | -1.076280000 | 4.599375000  |
| H | -5.412929000  | -0.460226000 | 4.615862000  |
| H | -4.403206000  | -0.312569000 | 3.145403000  |
| H | -9.379173000  | -0.983371000 | 2.337628000  |
| N | -9.777183000  | -2.530486000 | -0.172923000 |
| C | -10.351941000 | -3.627936000 | -0.929680000 |
| H | -10.740109000 | -3.288426000 | -1.894888000 |
| H | -11.160882000 | -4.102973000 | -0.369139000 |
| H | -10.361449000 | -1.764657000 | 0.123088000  |
| H | -9.560655000  | -4.354619000 | -1.105657000 |
| H | 7.212196000   | 1.434861000  | 3.785991000  |
| C | 7.841753000   | 1.073115000  | 2.973225000  |
| C | 7.464732000   | 1.655522000  | 1.626355000  |
| O | 8.256926000   | 1.643582000  | 0.686745000  |
| H | 7.763902000   | -0.015994000 | 2.923283000  |
| H | 8.882843000   | 1.323344000  | 3.174734000  |
| N | 6.218207000   | 2.178424000  | 1.526053000  |
| C | 5.669362000   | 2.663493000  | 0.268190000  |
| C | 6.128714000   | 4.090564000  | 0.005883000  |
| O | 5.371048000   | 5.051676000  | 0.064031000  |
| C | 4.131712000   | 2.555220000  | 0.293548000  |
| S | 3.445222000   | 1.185989000  | -0.709546000 |
| H | 1.474520000   | 1.672645000  | -1.249600000 |
| H | 6.064562000   | 2.024001000  | -0.524040000 |
| H | 3.786811000   | 2.457723000  | 1.328519000  |
| H | 3.725836000   | 3.493970000  | -0.081124000 |
| H | 5.592909000   | 2.106351000  | 2.313803000  |
| N | 7.444194000   | 4.186391000  | -0.306188000 |
| C | 8.103203000   | 5.462559000  | -0.503627000 |
| H | 8.792922000   | 5.688232000  | 0.316660000  |
| H | 7.996010000   | 3.335262000  | -0.242782000 |
| H | 8.664458000   | 5.465179000  | -1.441755000 |
| H | 7.336140000   | 6.234193000  | -0.541138000 |
| H | 3.988746000   | 0.540040000  | -3.372651000 |
| C | 3.562233000   | -0.225481000 | -4.025650000 |
| C | 2.804871000   | -1.197771000 | -3.147875000 |
| O | 1.792061000   | -0.856967000 | -2.539603000 |
| H | 4.358139000   | -0.693656000 | -4.607271000 |
| H | 2.855106000   | 0.259354000  | -4.700766000 |
| N | 3.341707000   | -2.440181000 | -3.059632000 |
| C | 2.731513000   | -3.557228000 | -2.346391000 |
| C | 3.604200000   | -4.800286000 | -2.464453000 |

|    |              |              |              |
|----|--------------|--------------|--------------|
| O  | 4.113363000  | -5.117198000 | -3.532210000 |
| C  | 1.326526000  | -3.880190000 | -2.919256000 |
| C  | 0.482029000  | -4.732757000 | -1.977153000 |
| S  | -1.227802000 | -4.996329000 | -2.561857000 |
| C  | -0.913977000 | -6.093753000 | -3.979929000 |
| H  | 2.619010000  | -3.275914000 | -1.298080000 |
| H  | 0.811523000  | -2.936717000 | -3.091755000 |
| H  | 1.461745000  | -4.373256000 | -3.885084000 |
| H  | 0.937412000  | -5.707187000 | -1.785627000 |
| H  | 0.370354000  | -4.231481000 | -1.012151000 |
| H  | -1.887870000 | -6.389152000 | -4.371467000 |
| H  | -0.374292000 | -6.988160000 | -3.662079000 |
| H  | -0.355737000 | -5.587423000 | -4.768089000 |
| H  | 4.079375000  | -2.698144000 | -3.699873000 |
| N  | 3.711947000  | -5.502684000 | -1.313621000 |
| H  | 3.905405000  | -7.492817000 | -0.678211000 |
| H  | 3.383430000  | -5.058660000 | -0.458577000 |
| C  | 4.469954000  | -6.737627000 | -1.229442000 |
| H  | 5.432671000  | -6.583284000 | -0.732134000 |
| H  | 4.655244000  | -7.089023000 | -2.243057000 |
| Se | 3.410138000  | -1.290580000 | 0.506526000  |
| C  | 3.318502000  | -0.372577000 | 2.218869000  |
| C  | 2.188362000  | 0.277628000  | 2.758522000  |
| C  | 2.311589000  | 0.891158000  | 4.015158000  |
| C  | 3.489501000  | 0.847559000  | 4.745408000  |
| C  | 4.598891000  | 0.201746000  | 4.209759000  |
| C  | 4.511537000  | -0.378777000 | 2.949197000  |
| N  | 0.442041000  | -0.394775000 | 1.156040000  |
| C  | 0.802089000  | 0.434410000  | 2.165407000  |
| O  | 0.046040000  | 1.292977000  | 2.626495000  |
| C  | -0.799439000 | -0.463241000 | 0.492441000  |
| C  | -1.985096000 | 0.079865000  | 1.003737000  |
| C  | -3.171038000 | -0.076699000 | 0.289981000  |
| C  | -3.199727000 | -0.769531000 | -0.917397000 |
| C  | -2.014700000 | -1.302707000 | -1.424165000 |
| C  | -0.821086000 | -1.145404000 | -0.731920000 |
| H  | 1.438870000  | 1.398568000  | 4.402544000  |
| H  | 3.538762000  | 1.311622000  | 5.723204000  |
| H  | 5.527098000  | 0.147567000  | 4.765743000  |
| H  | 5.379189000  | -0.852379000 | 2.510963000  |
| H  | -1.966496000 | 0.610455000  | 1.942026000  |
| H  | -4.086950000 | 0.337213000  | 0.696098000  |
| H  | -4.133751000 | -0.904555000 | -1.449741000 |
| H  | -2.014737000 | -1.857404000 | -2.354936000 |
| H  | 0.107733000  | -1.509985000 | -1.153401000 |
| H  | 1.190862000  | -0.957858000 | 0.750020000  |
| S  | 3.130212000  | -3.458055000 | 1.491807000  |
| C  | 4.854970000  | -3.898262000 | 1.950855000  |
| C  | 4.924687000  | -5.328443000 | 2.479718000  |
| H  | 5.490280000  | -3.772064000 | 1.071507000  |
| H  | 5.192649000  | -3.197569000 | 2.716585000  |
| H  | 4.289640000  | -5.451395000 | 3.359905000  |
| H  | 5.951890000  | -5.581060000 | 2.761144000  |
| H  | 4.595243000  | -6.049043000 | 1.727322000  |

Pinhb(-)

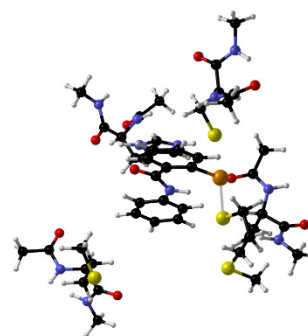

**E= -7072.01637017**

**Nimag=0**

|   |              |              |              |
|---|--------------|--------------|--------------|
| C | 2.142263000  | 6.026330000  | 5.358714000  |
| C | 3.053748000  | 5.649981000  | 4.209363000  |
| O | 4.263956000  | 5.615238000  | 4.312134000  |
| H | 1.122767000  | 6.258931000  | 5.045954000  |
| H | 2.570419000  | 6.884547000  | 5.876290000  |
| H | 2.113196000  | 5.195107000  | 6.067730000  |
| N | 2.411967000  | 5.353254000  | 3.023950000  |
| C | 3.143923000  | 4.774739000  | 1.902371000  |
| C | 2.808576000  | 5.437912000  | 0.572131000  |
| O | 2.672042000  | 4.778525000  | -0.458090000 |
| C | 3.042590000  | 3.225607000  | 1.846389000  |
| C | 1.719435000  | 2.574996000  | 1.557372000  |
| N | 1.116596000  | 2.633939000  | 0.306120000  |
| C | 0.972439000  | 1.676208000  | 2.269777000  |
| C | 0.070715000  | 1.807035000  | 0.249907000  |
| N | -0.044788000 | 1.224359000  | 1.443526000  |
| H | 1.484402000  | 3.227769000  | -0.435718000 |
| H | 4.193651000  | 4.997347000  | 2.117875000  |
| H | 3.752967000  | 2.878343000  | 1.091500000  |
| H | 3.397771000  | 2.851383000  | 2.807793000  |
| H | -0.524363000 | 1.602295000  | -0.628634000 |
| H | 1.107509000  | 1.286440000  | 3.262568000  |
| H | 1.408207000  | 5.247830000  | 3.033756000  |
| N | 2.709253000  | 6.780003000  | 0.615271000  |
| C | 2.455720000  | 7.598344000  | -0.560567000 |
| H | 3.295114000  | 8.271131000  | -0.751343000 |
| H | 1.545631000  | 8.188642000  | -0.431314000 |
| H | 2.819433000  | 7.224338000  | 1.514034000  |
| H | 2.333894000  | 6.930139000  | -1.410302000 |
| H | 10.607858000 | 1.123532000  | -3.143589000 |
| C | 10.028245000 | 1.864940000  | -2.590326000 |
| C | 9.107041000  | 1.260388000  | -1.547844000 |
| O | 8.545320000  | 1.937023000  | -0.706940000 |
| H | 9.424863000  | 2.440631000  | -3.296339000 |
| H | 10.706395000 | 2.560032000  | -2.094615000 |
| N | 8.962100000  | -0.105945000 | -1.617400000 |
| C | 7.953331000  | -0.797826000 | -0.820718000 |
| C | 8.445542000  | -2.090032000 | -0.179392000 |
| O | 7.661315000  | -2.955610000 | 0.171279000  |
| C | 6.607674000  | -0.990284000 | -1.538114000 |
| C | 6.683284000  | -1.854526000 | -2.792732000 |
| S | 5.056470000  | -2.241530000 | -3.525680000 |
| C | 4.459198000  | -0.575970000 | -3.945976000 |
| H | 7.765294000  | -0.114796000 | 0.014560000  |
| H | 5.919120000  | -1.455890000 | -0.832462000 |
| H | 6.221935000  | 0.002677000  | -1.781461000 |

|   |              |              |              |
|---|--------------|--------------|--------------|
| H | 7.312639000  | -1.393905000 | -3.561999000 |
| H | 7.102805000  | -2.832826000 | -2.548062000 |
| H | 3.525510000  | -0.712460000 | -4.492150000 |
| H | 5.170512000  | -0.051324000 | -4.587923000 |
| H | 4.254020000  | 0.016562000  | -3.053886000 |
| H | 9.311444000  | -0.573479000 | -2.440384000 |
| N | 9.792058000  | -2.173902000 | -0.007609000 |
| C | 10.418058000 | -3.280430000 | 0.693833000  |
| H | 10.796771000 | -2.971216000 | 1.672907000  |
| H | 11.243322000 | -3.692210000 | 0.107816000  |
| H | 10.342741000 | -1.372464000 | -0.272144000 |
| H | 9.660078000  | -4.048420000 | 0.837880000  |
| H | -7.396066000 | 1.206954000  | -3.302569000 |
| C | -7.845797000 | 0.703181000  | -2.444829000 |
| C | -7.550429000 | 1.416341000  | -1.143673000 |
| O | -8.307870000 | 1.365537000  | -0.177971000 |
| H | -7.435376000 | -0.309066000 | -2.388588000 |
| H | -8.924043000 | 0.633551000  | -2.577461000 |
| N | -6.375342000 | 2.095926000  | -1.107944000 |
| C | -5.805826000 | 2.549253000  | 0.152481000  |
| C | -6.299444000 | 3.950365000  | 0.482949000  |
| O | -5.569525000 | 4.932408000  | 0.425065000  |
| C | -4.273523000 | 2.575000000  | 0.137116000  |
| S | -3.429661000 | 1.078558000  | -0.485431000 |
| H | -6.160748000 | 1.861379000  | 0.925722000  |
| H | -3.923963000 | 3.449921000  | -0.409687000 |
| H | -3.921318000 | 2.702484000  | 1.161791000  |
| H | -5.746885000 | 2.026042000  | -1.901192000 |
| N | -7.603384000 | 3.985670000  | 0.843680000  |
| C | -8.308141000 | 5.230301000  | 1.088691000  |
| H | -9.017275000 | 5.451312000  | 0.284586000  |
| H | -8.125483000 | 3.117236000  | 0.754834000  |
| H | -8.854287000 | 5.181716000  | 2.033894000  |
| H | -7.571676000 | 6.030427000  | 1.138218000  |
| H | -4.866147000 | -0.587540000 | 3.696678000  |
| C | -4.126475000 | -0.213313000 | 2.987281000  |
| C | -3.073307000 | -1.241318000 | 2.623302000  |
| O | -1.992166000 | -0.897293000 | 2.124915000  |
| H | -3.641080000 | 0.671565000  | 3.399544000  |
| H | -4.646937000 | 0.074064000  | 2.069299000  |
| N | -3.422463000 | -2.524930000 | 2.838456000  |
| C | -2.613608000 | -3.674779000 | 2.441792000  |
| C | -3.445513000 | -4.947361000 | 2.534271000  |
| O | -4.096732000 | -5.209530000 | 3.535461000  |
| C | -1.370016000 | -3.803993000 | 3.346697000  |
| C | -0.426463000 | -4.913177000 | 2.887296000  |
| S | 1.146014000  | -4.977195000 | 3.814693000  |
| C | 0.534949000  | -5.485310000 | 5.452492000  |
| H | -2.297838000 | -3.521410000 | 1.404909000  |
| H | -0.842343000 | -2.849216000 | 3.334162000  |
| H | -1.714098000 | -3.990867000 | 4.367398000  |
| H | -0.901216000 | -5.894256000 | 2.949731000  |
| H | -0.136215000 | -4.767601000 | 1.844451000  |
| H | 1.411305000  | -5.663865000 | 6.076385000  |
| H | -0.039961000 | -6.410144000 | 5.374925000  |
| H | -0.077435000 | -4.710703000 | 5.915149000  |
| H | -4.274788000 | -2.737079000 | 3.338148000  |
| N | -3.322108000 | -5.745461000 | 1.462043000  |
| H | -3.568721000 | -7.590152000 | 0.554328000  |
| H | -2.812079000 | -5.385911000 | 0.633800000  |
| C | -3.981926000 | -7.034227000 | 1.395720000  |

|    |              |              |              |
|----|--------------|--------------|--------------|
| H  | -5.062795000 | -6.927497000 | 1.255399000  |
| H  | -3.818917000 | -7.593093000 | 2.319708000  |
| Se | -3.341930000 | 1.699337000  | -2.672215000 |
| C  | -3.209626000 | -0.060014000 | -3.447440000 |
| C  | -2.117296000 | -0.915604000 | -3.222684000 |
| C  | -2.117695000 | -2.175505000 | -3.828207000 |
| C  | -3.163869000 | -2.569699000 | -4.657685000 |
| C  | -4.238647000 | -1.716767000 | -4.876127000 |
| C  | -4.268826000 | -0.469455000 | -4.257400000 |
| N  | -0.502633000 | -1.488475000 | -1.539641000 |
| C  | -0.943523000 | -0.515896000 | -2.370854000 |
| O  | -0.451171000 | 0.613463000  | -2.450734000 |
| C  | 0.611857000  | -1.372195000 | -0.684372000 |
| C  | 1.739490000  | -0.607459000 | -1.011618000 |
| C  | 2.807787000  | -0.539073000 | -0.122080000 |
| C  | 2.774954000  | -1.230048000 | 1.087804000  |
| C  | 1.657331000  | -2.001346000 | 1.404331000  |
| C  | 0.581887000  | -2.072352000 | 0.526383000  |
| H  | -1.303452000 | -2.858637000 | -3.632889000 |
| H  | -3.139712000 | -3.551751000 | -5.113550000 |
| H  | -5.063858000 | -2.023560000 | -5.508017000 |
| H  | -5.119097000 | 0.186210000  | -4.394397000 |
| H  | 1.767478000  | -0.070920000 | -1.947831000 |
| H  | 3.682555000  | 0.043909000  | -0.388865000 |
| H  | 3.618417000  | -1.185220000 | 1.766821000  |
| H  | 1.623228000  | -2.553777000 | 2.336605000  |
| H  | -0.300905000 | -2.647524000 | 0.764552000  |
| H  | -1.094905000 | -2.350526000 | -1.410282000 |
| S  | -2.104790000 | -4.240573000 | -1.113376000 |
| C  | -3.896983000 | -3.953408000 | -1.430837000 |
| C  | -4.440937000 | -2.650508000 | -0.847873000 |
| H  | -4.067884000 | -3.964502000 | -2.510658000 |
| H  | -4.458507000 | -4.797976000 | -1.018153000 |
| H  | -4.333974000 | -2.630520000 | 0.239211000  |
| H  | -5.505336000 | -2.520541000 | -1.085790000 |
| H  | -3.902268000 | -1.790909000 | -1.245893000 |
| H  | -0.747347000 | 0.500268000  | 1.672416000  |

**Pinhb**

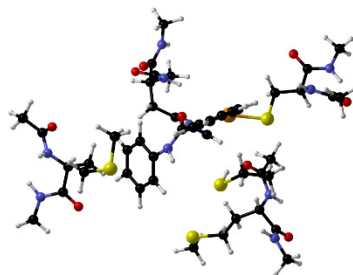

**E= -7072.02666011**

**Nimag=0**

|   |              |             |              |
|---|--------------|-------------|--------------|
| C | -0.830472000 | 6.345996000 | -4.916076000 |
|---|--------------|-------------|--------------|

|   |               |              |              |    |              |              |              |
|---|---------------|--------------|--------------|----|--------------|--------------|--------------|
| C | -1.784886000  | 6.092118000  | -3.763896000 | H  | 8.368508000  | -1.071608000 | 3.215571000  |
| O | -2.924956000  | 6.518094000  | -3.760484000 | H  | 9.367517000  | 0.297111000  | 3.697249000  |
| H | 0.194714000   | 6.034788000  | -4.708738000 | N  | 6.971720000  | 1.340797000  | 1.860477000  |
| H | -0.848619000  | 7.408857000  | -5.160148000 | C  | 6.525220000  | 1.877604000  | 0.583399000  |
| H | -1.194436000  | 5.802007000  | -5.790961000 | C  | 7.136337000  | 3.250527000  | 0.343397000  |
| N | -1.256386000  | 5.360968000  | -2.725989000 | O  | 6.479640000  | 4.276043000  | 0.447342000  |
| C | -2.103941000  | 4.797379000  | -1.680796000 | C  | 5.005507000  | 1.985220000  | 0.592815000  |
| C | -1.818405000  | 5.387810000  | -0.305405000 | S  | 4.286745000  | 0.326855000  | 0.927261000  |
| O | -2.304642000  | 4.877597000  | 0.695098000  | H  | 1.506394000  | -2.221433000 | 0.129425000  |
| C | -2.160762000  | 3.251656000  | -1.729284000 | H  | 6.862043000  | 1.186819000  | -0.194789000 |
| C | -0.940633000  | 2.549189000  | -2.241852000 | H  | 4.679395000  | 2.698359000  | 1.349114000  |
| N | -0.212474000  | 1.676264000  | -1.467616000 | H  | 4.657130000  | 2.342613000  | -0.374099000 |
| C | -0.334321000  | 2.494289000  | -3.483802000 | H  | 6.327389000  | 1.381129000  | 2.633951000  |
| C | 0.770666000   | 1.138013000  | -2.243216000 | N  | 8.449698000  | 3.205501000  | 0.014428000  |
| N | 0.730614000   | 1.619191000  | -3.471324000 | C  | 9.246706000  | 4.407836000  | -0.149545000 |
| H | -0.415382000  | 1.453400000  | -0.495660000 | H  | 9.937968000  | 4.546046000  | 0.688037000  |
| H | -3.107847000  | 5.168029000  | -1.909654000 | H  | 8.908760000  | 2.301818000  | 0.078400000  |
| H | -2.395641000  | 2.910166000  | -0.723017000 | H  | 9.822832000  | 4.360238000  | -1.076514000 |
| H | -3.004882000  | 2.977780000  | -2.365996000 | H  | 8.568363000  | 5.258170000  | -0.189754000 |
| H | 1.465501000   | 0.396429000  | -1.877264000 | H  | 4.948345000  | -1.031735000 | -4.123347000 |
| H | -0.630601000  | 3.002324000  | -4.389324000 | C  | 4.296465000  | -0.618177000 | -3.352328000 |
| H | -0.391845000  | 4.863829000  | -2.897909000 | C  | 3.578680000  | -1.671431000 | -2.543097000 |
| N | -1.055578000  | 6.506087000  | -0.290438000 | O  | 2.793513000  | -1.363315000 | -1.646387000 |
| C | -0.772003000  | 7.239534000  | 0.927381000  | H  | 3.546465000  | 0.029103000  | -3.813787000 |
| H | -1.213645000  | 8.240272000  | 0.899837000  | H  | 4.886447000  | -0.003772000 | -2.668940000 |
| H | 0.306001000   | 7.331493000  | 1.085608000  | N  | 3.828940000  | -2.968905000 | -2.849127000 |
| H | -0.707840000  | 6.835531000  | -1.176659000 | C  | 3.081465000  | -4.018184000 | -2.164365000 |
| H | -1.208161000  | 6.681253000  | 1.754199000  | C  | 3.828087000  | -5.342954000 | -2.250766000 |
| H | -10.108902000 | 1.546838000  | 2.705397000  | O  | 4.528789000  | -5.615790000 | -3.215044000 |
| C | -9.547388000  | 2.251766000  | 2.088940000  | C  | 1.664000000  | -4.128408000 | -2.786918000 |
| C | -8.641976000  | 1.582461000  | 1.072736000  | C  | 0.764617000  | -5.191041000 | -2.155428000 |
| O | -8.106241000  | 2.200937000  | 0.173536000  | S  | -1.017444000 | -4.938802000 | -2.462654000 |
| H | -8.933735000  | 2.880036000  | 2.738999000  | C  | -1.068717000 | -5.032240000 | -4.279188000 |
| H | -10.241235000 | 2.906113000  | 1.560719000  | H  | 2.967535000  | -3.718605000 | -1.124067000 |
| N | -8.478592000  | 0.224906000  | 1.237577000  | H  | 1.198620000  | -3.148262000 | -2.670038000 |
| C | -7.466152000  | -0.509018000 | 0.484375000  | H  | 1.783529000  | -3.515755000 | -3.857123000 |
| C | -7.999699000  | -1.739430000 | -0.240040000 | H  | 1.042482000  | -6.197580000 | -2.477360000 |
| O | -7.248486000  | -2.635077000 | -0.595098000 | H  | 0.836951000  | -5.149566000 | -1.066953000 |
| C | -6.216442000  | -0.835327000 | 1.317379000  | H  | -2.119787000 | -4.983654000 | -4.564878000 |
| C | -6.459875000  | -1.729777000 | 2.526533000  | H  | -0.649664000 | -5.976960000 | -4.631594000 |
| S | -4.931884000  | -2.124661000 | 3.454111000  | H  | -0.541267000 | -4.195475000 | -4.737687000 |
| C | -4.416897000  | -0.459410000 | 3.978240000  | H  | 4.451384000  | -3.252349000 | -3.591661000 |
| H | -7.153220000  | 0.184697000  | -0.301789000 | N  | 3.628721000  | -6.175774000 | -1.196327000 |
| H | -5.501821000  | -1.326641000 | 0.663644000  | H  | 3.336356000  | -8.268017000 | -1.241638000 |
| H | -5.780228000  | 0.114370000  | 1.629253000  | H  | 3.007418000  | -5.870508000 | -0.463711000 |
| H | -7.172179000  | -1.290874000 | 3.233716000  | C  | 4.144004000  | -7.534124000 | -1.164155000 |
| H | -6.846689000  | -2.701253000 | 2.211255000  | H  | 4.701688000  | -7.713393000 | -0.242212000 |
| H | -3.612264000  | -0.592090000 | 4.702389000  | H  | 4.811873000  | -7.650381000 | -2.015545000 |
| H | -5.240324000  | 0.064668000  | 4.467834000  | Se | 2.136899000  | 0.887365000  | 1.032784000  |
| H | -4.042798000  | 0.128717000  | 3.140771000  | C  | 1.676111000  | 0.239604000  | 2.800603000  |
| H | -8.830726000  | -0.193801000 | 2.084547000  | C  | 0.344263000  | -0.165145000 | 3.022765000  |
| N | -9.336871000  | -1.736750000 | -0.479510000 | C  | -0.011127000 | -0.746822000 | 4.240691000  |
| C | -9.990869000  | -2.769711000 | -1.261238000 | C  | 0.934161000  | -0.914107000 | 5.247071000  |
| H | -10.327442000 | -2.385399000 | -2.228960000 | C  | 2.245392000  | -0.495202000 | 5.030821000  |
| H | -10.850557000 | -3.177915000 | -0.723717000 | C  | 2.616727000  | 0.068899000  | 3.813368000  |
| H | -9.855197000  | -0.923781000 | -0.186332000 | N  | -1.622072000 | -0.815276000 | 1.733622000  |
| H | -9.263517000  | -3.561800000 | -1.431051000 | C  | -0.652216000 | 0.110604000  | 1.953170000  |
| H | 7.631151000   | 0.285644000  | 4.094992000  | O  | -0.544945000 | 1.147086000  | 1.294672000  |
| C | 8.375286000   | 0.012911000  | 3.344825000  | C  | -2.519422000 | -0.764510000 | 0.630911000  |
| C | 8.135493000   | 0.654591000  | 1.995282000  | C  | -3.158428000 | 0.422560000  | 0.272052000  |
| O | 8.941175000   | 0.548943000  | 1.075860000  | C  | -4.005391000 | 0.434981000  | -0.832557000 |



|   |              |              |              |   |             |              |             |
|---|--------------|--------------|--------------|---|-------------|--------------|-------------|
| C | -4.227894000 | -0.724935000 | -1.569064000 | C | 2.366887000 | -3.173346000 | 2.179440000 |
| C | -3.600204000 | -1.910741000 | -1.193700000 | C | 3.761749000 | -3.334458000 | 1.588623000 |
| C | -2.744801000 | -1.932938000 | -0.098988000 | H | 2.292616000 | -2.251380000 | 2.749387000 |
| H | -1.039729000 | -1.046353000 | 4.405168000  | H | 2.124882000 | -3.996256000 | 2.855469000 |
| H | 0.647984000  | -1.354704000 | 6.194001000  | H | 3.883611000 | -4.299316000 | 1.091018000 |
| H | 2.987282000  | -0.611343000 | 5.812587000  | H | 4.514030000 | -3.266790000 | 2.380652000 |
| H | 3.645316000  | 0.353228000  | 3.632414000  | H | 3.971298000 | -2.549207000 | 0.860185000 |
| H | -2.990482000 | 1.323360000  | 0.845102000  |   |             |              |             |
| H | -4.506105000 | 1.356374000  | -1.102771000 |   |             |              |             |
| H | -4.898641000 | -0.712138000 | -2.418908000 |   |             |              |             |
| H | -3.773526000 | -2.822536000 | -1.750219000 |   |             |              |             |
| H | -2.238231000 | -2.849783000 | 0.178058000  |   |             |              |             |
| H | -1.454473000 | -1.732953000 | 2.122116000  |   |             |              |             |
| S | 1.015900000  | -3.190052000 | 0.935536000  |   |             |              |             |

**Table S2.** Electronic ( $\Delta E$ ) and Gibbs ( $\Delta G_{\text{solv}}$ ) free energies (kcal mol<sup>-1</sup>) relative to the RC for Ebselen (EbSe) mechanism.

|       | $\Delta E$ | $\Delta G_{\text{solv}}$ |
|-------|------------|--------------------------|
| RC    | 0.00       | 0.00                     |
| TS1   | 14.90      | 15.16                    |
| TCI   | 3.42       | 3.41                     |
| TS2   | 31.16      | 29.93                    |
| Pinhb | -8.83      | -6.86                    |

**Table S3.** Electronic ( $\Delta E$ ) and Gibbs ( $\Delta G_{\text{solv}}$ ) free energies (kcal mol<sup>-1</sup>) relative to the RC for Ebselen ethanethiolate (EbSeS) mechanism.

|          | $\Delta E$ | $\Delta G_{\text{solv}}$ |
|----------|------------|--------------------------|
| RC       | 0.00       | 0.00                     |
| TS1      | 9.15       | 8.83                     |
| IP       | 8.58*      | 9.62*                    |
| TCI      | -3.33      | 1.25                     |
| Pinhb(-) | 4.02       | 5.20                     |
| Pinhb    | -2.44      | -1.78                    |

\* $\Delta G_{\text{solv}}$  of the IP is higher in energy than the TS1 required to reach such minimum, this is likely an effect of the thermodynamic corrections, strongly dependent on frequency calculations, due to the fact that the two stationary points are very close in energy. The correct behaviour (i.e. with the minimum (IP) at lower energy than the TS (TS1) required to reach it is correctly present in the electronic energies. In both cases, the two structures are almost isoenergetic.
